1  
2  
3  
4  
5  
6  
7  
8  
9  
10  
11  
12  
13  
14  
15  
16  
17  
18  
19  
20  
21  
22  
23  
24  
25  
26  
27  
28  
29  
30  
31  
32  
33  
34  
35  
36  
37  
38  
39  
40  
41  
42  
43  
44  
45  
46  
47  
48  
49  
50  
51  
52  
53  
54  
55

# Chronic Pb<sup>2+</sup> exposure causes theta-band hypersynchrony disrupting sensory motor gating and exacerbating absence seizures

Abbreviated Title: LEAD EXPOSURE CAUSES HIPPOCAMPAL HYPERSYNCHRONY

Nathan W. Schultheiss<sup>1</sup>, Jennifer L. McGlothan<sup>2</sup>, Tomás R. Guilarte<sup>2\*</sup>, Timothy A. Allen<sup>1,2,3\*</sup>

<sup>1</sup>Department of Psychology, Florida International University, Miami, FL, 33199

<sup>2</sup>Department of Environmental Health Sciences, Robert Stempel College of Public Health, Florida International University, Miami, FL, 33199

<sup>3</sup>Cognitive Neuroscience Program, Florida International University, Miami, FL, 33199

Number of figures: 4  
Number of supplemental figures: 6  
Number of tables: 1  
Number of text pages: 40

## \*Corresponding Authors:

Timothy A. Allen, PhD  
Department of Psychology  
email: [tallen@fiu.edu](mailto:tallen@fiu.edu)  
Website: <http://allenlab.fiu.edu/>  
Twitter: @AllenNeuroLab

Tomás R. Guilarte, PhD  
Department of Environmental Health Sciences  
email: [tguilart@fiu.edu](mailto:tguilart@fiu.edu)  
website: <https://stempel.fiu.edu/brain-behavior-environment-laboratory/>  
Twitter: @guilartelab

Address:  
Florida International University  
11200 SW 8<sup>th</sup> Street  
Miami, FL, 33199

Conflict of Interest: The authors declare no competing financial interests.

Acknowledgements: This work was supported by R01 ES006189 to T.R.G. and R01 MH113626 to T.A.A.

Keywords: hippocampus, schizophrenia, lead neurotoxicity, pre-pulse inhibition

## LEAD EXPOSURE CAUSES HIPPOCAMPAL HYPERSYNCHRONY

56 **ABSTRACT**

57 Chronic lead ( $Pb^{2+}$ ) exposure from childhood contributes to an array of cognitive and behavioral

58 dysfunctions including impaired attention and intellectual ability, learning and memory deficits, and

59 delinquency. It is also an environmental risk factor for adult psychopathologies, most notably

60 schizophrenia and epilepsy.  $Pb^{2+}$  is a potent N-methyl-D-aspartate receptor (NMDAR) antagonist

61 and exposure during early life elicits a cascade of cellular neurotoxic effects that alter the

62 developmental trajectory leading to a loss of parvalbumin-expressing interneurons in hippocampus

63 and altered synaptic transmission. Little is known, however, about the impact of chronic  $Pb^{2+}$

64 exposure on hippocampal network dynamics which serve as a link between cellular-molecular

65 effects and cognitive-behavioral consequences of  $Pb^{2+}$  neurotoxicity. Here, we tested the effects of

66 chronic  $Pb^{2+}$  exposure on the hippocampal local field potential (LFP) of freely-behaving rats.  $Pb^{2+}$

67 exposure caused striking theta rhythmic hypersynchrony and heightened behavioral modulation of

68 theta during locomotor behavior.  $Pb^{2+}$  exposure also markedly exacerbated absence seizures

69 appearing in the LFP as spike-wave discharges with a theta-band fundamental frequency and

70 strong theta-harmonic synchronization. Mechanisms of theta rhythmogenesis have been implicated

71 in impairments of prepulse inhibition of the acoustic startle reflex (PPI), so we tested the effect of

72  $Pb^{2+}$  exposure on PPI in male and female rats at different developmental timepoints. We found that

73 adult males (PN50 and 120), but neither females nor juvenile males showed reduced PPI

74 independent of changes in the startle reflex. This pattern recapitulates sex- and age-dependencies

75 of PPI disruption in schizophrenic patients. Overall, these results are consistent with the hypothesis

76 that  $Pb^{2+}$  is an environmental risk factor for psychopathology in adulthood, especially those

77 symptoms related to cognitive and sensory-motor gating processes that depend on rhythmic

78 coordination of network activity in the hippocampus.

## LEAD EXPOSURE CAUSES HIPPOCAMPAL HYPERSYNCHRONY

79 **Introduction**

80 Environmental exposure to lead ( $Pb^{2+}$ ) is a major health problem affecting millions of people

81 worldwide.  $Pb^{2+}$  exposure in children has been linked to reduced intellectual abilities, increases in

82 delinquent and antisocial behaviors, and attention deficit and hyperactivity disorder (Needleman et

83 al., 2002; 2004; Miranda et al., 2007; Canfield et al., 2003; Caito & Aschner, 2017). Further, early

84 life  $Pb^{2+}$  exposure has been proposed as an environmental risk factor for adult psychopathology,

85 within significant comorbidity with both epilepsy and schizophrenia (Opler et al., 2004; 2008). A

86 current leading hypothesis is that schizophrenia is best understood as the result of interactions

87 between genetic and environmental factors (Guilarte et al., 2012), with evidence that  $Pb^{2+}$  exposure

88 exacerbates cognitive and behavioral deficits in the DISC1 knock out mouse model of

89 schizophrenia (Abazyan et al., 2014).

90 Understanding the relationship between  $Pb^{2+}$ -exposure and mental health pathologies

91 requires a neurobiological approach to establishing the link between genetic and environmental

92 factors. At the cellular and molecular levels, much is known about  $Pb^{2+}$  effects on the developing

93 brain.  $Pb^{2+}$  is a potent N-methyl-D-aspartate (NMDA) receptor antagonist (Guilarte, 1997; Guilarte &

94 Miceli, 1993; Guilarte & Miceli, 1992). Low-to-moderate  $Pb^{2+}$  levels in the brain (which has no

95 endogenous function) leads to NMDAR hypoactivity, which can alter the developmental trajectory of

96 the NMDAR subunits (Guilarte & McGlothan, 1998; Nihei et al., 2000), and impair the maintenance

97 synaptic long-term potentiation (Nihei et al., 2000). At the cellular level,  $Pb^{2+}$  exposure causes a

98 reduction in the number of parvalbumin-labeled GABAergic interneurons in the hippocampus and

99 agranular medial prefrontal cortex (Stansfield et al., 2015), a hallmark cellular pathology in

100 schizophrenic brains (e.g., Hashimoto et al., 2003). At the level of the whole brain, annual childhood

101 blood  $Pb^{2+}$  levels have been found to be inversely correlated with cortical gray matter volume

102 (Brubaker et al., 2010). Likewise, an electroencephalography (EEG) study of  $Pb^{2+}$ -exposure, as

103 measured by tooth  $Pb^{2+}$ , showed there are significant alterations in delta, theta and gamma bands

## LEAD EXPOSURE CAUSES HIPPOCAMPAL HYPERSYNCHRONY

104 related to cognitive function, the severity of which corresponded to the exposure levels  
105 (Needleman, 1983).

106         However, the bridge between the cellular-molecular and cognitive-behavioral levels is not  
107 well understood. Linking these levels requires animal models of Pb<sup>2+</sup> exposure allowing for invasive  
108 techniques that can establish a causal link between Pb<sup>2+</sup> exposure, specific neurobiological  
109 mechanisms, and behaviorally-relevant network consequences. Here, we performed chronic *in vivo*  
110 hippocampal recordings from a well-established rodent model of Pb<sup>2+</sup> exposure during open field  
111 behaviors (Schultheiss et al., 2020). This initial study of the rhythmic network effects of chronic Pb<sup>2+</sup>  
112 exposure focused on the hippocampus because chronic Pb<sup>2+</sup>-exposure causes reliable and severe  
113 deficits in hippocampal-dependent spatial learning (Kuhlmann et al., 1997; Jett et al., 199; Munoz et  
114 al., 1988) which can be ameliorated with environment enrichment (Cao et al., 2008; Guilarte et al.,  
115 2002), similar to other hippocampal insults. Likewise, Pb<sup>2+</sup>-exposure causes contextual but not cued  
116 fear conditioning deficits (Jaako-Movits et al., 2005; McGlothan et al., 2008; Wang et al., 2016), in  
117 addition to fear extinction impairments (McGlothan et al., 2008). These behavioral results are  
118 consistent with the central role of hippocampal networks in mediating the effects of chronic Pb<sup>2+</sup>-  
119 exposure in psychotic disorders.

120         Our recordings and analysis focused on the spectral content of local field potentials (LFPs)  
121 from the hippocampus in of Pb<sup>2+</sup>-exposed rats using multisite silicon probes during stationary and  
122 running behaviors. LFPs are a good choice to examine network properties because they reflect the  
123 rhythmic synchrony among neurons aggregating local and long-range synaptic potentials. We  
124 observed several key abnormalities, most notably excessive hypersynchrony of the theta rhythm  
125 and increased amplitude of gamma oscillations, elevated behavior-related changes in the theta and  
126 gamma bands, and exacerbated intensity and incidence of absence seizures. Hypersynchrony is  
127 detrimental to local network processing and has been observed in other disorders. For example,  
128 hippocampal hypersynchrony in the theta and slow gamma ranges have also been observed in the

## LEAD EXPOSURE CAUSES HIPPOCAMPAL HYPERSYNCHRONY

129 LFP recordings of the freely-behaving *Fmr1-KO* mouse, a genetic model of Fragile X syndrome  
130 which is characterized by intellectual disability (Arbab et al., 2018).

131 Next, because over activation of the hippocampus is known to cause impaired sensory-  
132 motor gating (Bast et al., 2001a,b; Bast et al. 2003), we followed the network finding up by looking  
133 at the consequences of Pb<sup>2+</sup>-exposure on prepulse inhibition of the startle reflex (PPI). We found  
134 that Pb<sup>2+</sup>-exposure caused large and reliable sensory-motor gating deficits in male, but not female,  
135 adult rats in developmentally-relevant pattern (PN50 and PN120, but not PN28). These effects  
136 could not be attributed to baseline startle levels, and are in line with the Pb<sup>2+</sup> hypothesis of  
137 schizophrenia because PPI impairments are a hallmark pathological phenotype in the disease.

138 Altogether the present findings show that Pb<sup>2+</sup> exposure leads to pathological theta and  
139 gamma hypersynchrony in the hippocampus, increases seizures, and causes sensory-motor gating  
140 deficits. These abnormal hippocampal network effects may explain both the cognitive and the  
141 sensory-motor gating deficits seen in adult psychopathologies resultant of Pb<sup>2+</sup> exposure, and  
142 suggests normalizing hippocampal network dynamics as a therapeutic strategy.

143

144

### Methods

145 *Subjects.* Nine adult male Long-Evans rats were used in electrophysiological experiments.  
146 Five of these were chronically exposed to lead (Pb<sup>2+</sup>), and four were controls. Two hundred thirty  
147 rats were used in PPI experiments. These rats were evenly divided into twelve groups (18-21 per  
148 group) corresponding to all combinations of (1) Pb<sup>2+</sup> exposure and controls, (2) males and females,  
149 and (3) three ages at the time of testing. All rats were individually housed in a climate-controlled  
150 vivarium on a reversed 12hr light/dark cycle, and experiments were conducted during the dark cycle  
151 active periods. Rats had free access to food and water when in their home cages, but no food or  
152 rewards were available during behavioral sessions. All studies were carried out in strict accordance  
153 with the recommendations in the Guide for the Care and Use of Laboratory Animals of the National  
154 Institutes of Health under protocols approved by Florida International University Institutional Animal

## LEAD EXPOSURE CAUSES HIPPOCAMPAL HYPERSYNCHRONY

155 Care and Use Committee. Data from the four control rats in the electrophysiological experiments  
156 were previously analyzed to establish the relationships of hippocampal spectral modes to behaviors  
157 (Schultheiss et al., 2020). The present study focuses on the effects of Pb<sup>2+</sup> exposure and all  
158 analyses presented here are new.

159 *Breeding and Chronic Pb<sup>2+</sup> Exposure.* Prior to breeding, adult female rats (225-250 g) were  
160 purchased from Charles River Laboratories and randomly assigned to a Prolab RMH-1000 diet  
161 containing 0 (control) or 1500 ppm lead acetate (PbAc) (Dyets, Inc., Bethlehem, PA). After 10-14  
162 days of acclimation to the diet, each dam was paired with a non-exposed adult male Long Evans rat  
163 (250-275 g; Charles River Laboratories) to breed over 3 days. Litters were culled to 10 pups on  
164 postnatal day one (PN1). Dams were maintained on their respective diet, and at PN21 male pups  
165 were weaned onto the same diet and maintained for the duration of the experiments.

166 *Silicon probe implants.* All electrophysiological procedures were the same as we have  
167 previously described (see Schultheiss et al., 2020 for details). Briefly, silicon probes with 32  
168 recording electrodes arranged as eight tetrodes were surgically implanted for recording local field  
169 potentials (LFPs) from dorsal hippocampus (HC). The eight tetrodes were distributed across four  
170 shanks of the probe at tip-to-tetrode depths of 78  $\mu\text{m}$  and 228  $\mu\text{m}$  (NeuroNexus A4X2-tet-5mm).  
171 Shanks were separated by 200  $\mu\text{m}$  giving each probe a total length of 0.67 cm which was oriented  
172 medial-lateral when implanted to sample along the proximal-distal axis of the CA1 subregion of HC.  
173 Electrode impedances were  $1.23 \pm 0.32 \text{ M}\Omega$ .

174 *Surgical procedures.* The rats used in electrophysiological experiments weighed 600-700 g  
175 at the time of surgery. General anesthesia was induced with isoflurane (5%) mixed with oxygen (0.8  
176 L/min) that was continuously delivered throughout surgery at 1-4% as needed. Body temperature  
177 was monitored throughout surgery, and a Ringer's solution (5% dextrose) was given periodically to  
178 maintain hydration (1 ml increments every 60-90 minutes). Once the hair over the scalp was cut,  
179 rats were placed in a stereotaxic device, and glycopyrrolate (0.5 mg/kg, s.c.) was administered to  
180 assist respiratory stability. Ophthalmic ointment was then applied to the eyes. Four injections of

## LEAD EXPOSURE CAUSES HIPPOCAMPAL HYPERSYNCHRONY

181 marcaine were made to the scalp (~0.1 ml, 7.5 mg/ml, s.c.), and a rostrocaudal incision was made  
182 exposing the skull. The pitch of the skull was leveled between bregma and lambda, two stainless  
183 steel ground screws were placed in the left parietal bone, and five titanium support screws were  
184 anchored to the skull. Rectangular craniotomies were drilled to accommodate the probe shanks  
185 centered on coordinates A/P -3.24 mm, M/L 2.7 mm. After removal of the dura, the probe was  
186 lowered on the stereotaxic arm until the tips of the probe shanks were just above the cortical  
187 surface. Then, the ground wire was attached to the ground screws, and implants were lowered  
188 further until the electrodes reached a depth of ~2.8 mm below the cortical surface. A thin layer of  
189 sodium alginate was applied in the craniotomy to protect the exposed surface of the brain, and  
190 dental cement was applied to permanently secure the implant to the skull screws. Neosporin<sup>®</sup> was  
191 applied to the skin surrounding the implant, and flunixin (2.5 mg/kg, s.c.) was given for analgesia.  
192 Following surgery, rats were allowed to rest on a heating pad until ambulatory, prior to being  
193 returned to their home cages. Neosporin<sup>®</sup> and flunixin were given again on the day following  
194 surgery, and rats were monitored closely for five days to ensure that body weight was maintained.  
195 Daily Baytril injections (s.c.) were also given for five days to protect against postsurgical infection. A  
196 minimum of one week was reserved for recovery prior to beginning experiments.

197 *Behavioral Setup.* All electrophysiological experiments were conducted in a large open field  
198 environment (122 x 118 x 47 cm). A custom-made white cutting board served as the floor of the  
199 behavioral arena, and the interior walls were lined with white vinyl. The arena was mounted on stilts  
200 72 cm above the floor and the exterior was wrapped in grounded Faraday shielding. Two video  
201 cameras were used for behavioral tracking with a bird's eye view. These were mounted 28 cm apart  
202 from one another, 150 cm above of the arena floor, providing ~4.6 pixel/cm resolution in recorded  
203 videos and corresponding tracking data.

204 The entire behavioral apparatus was enshrouded with black curtains suspended from the  
205 ceiling and extending to the floor. Small gaps at the Velcro<sup>®</sup> closures between the four curtain  
206 panels were used to observe rats covertly to monitor that the head-stage, cables, and elastic



## LEAD EXPOSURE CAUSES HIPPOCAMPAL HYPERSYNCHRONY

207 tethers were not tangled, and to confirm that rats were awake during periods of relative inactivity. All  
208 room lights were kept off during recording sessions, and the white arena was illuminated dimly with  
209 red light from LED strips mounted above at the level of the video cameras.

210 During behavioral sessions rats were placed on the arena floor and recorded without any  
211 intervention except for infrequent behavioral checks or to adjust cables or connections.

212 *Electrophysiological recordings.* Throughout each experiment wide-band neural data were  
213 acquired with a Plexon OmniplexD recording system with A/D conversion at 40 kHz (16 bit). A  
214 digital head stage processing subsystem (Intan, 32 channel) passed continuous wide-band data  
215 referenced against the ground screws (low cutoff = 0.7 Hz) to a hard drive using PlexControl data  
216 acquisition software. For analysis of LFP recordings, wideband data was down-sampled to 2 kHz. A  
217 maximum of one channel per tetrode was included in our analyses, and twelve tetrodes were  
218 excluded for poor signal. As a result of these restrictions, 30 channels recorded from Pb<sup>2+</sup>-exposed  
219 rats were analyzed, and 30 channels from control animals were analyzed. All of the selected  
220 channels were included in all analyses, providing a robust sampling of hippocampal recording sites  
221 for each group.

222 *Behavioral tracking.* The physical and software settings for the two video cameras used for  
223 behavioral tracking were tuned independently to optimize detection of body contours on one  
224 camera and to optimize tracking of head-mounted LEDs on the other. LED tracking entailed  
225 tabulating the coordinates of two clusters of LED florets (one green and one blue) that were offset  
226 ~2 cm laterally from the head-stage at ~3 cm above the rat's head. Each LED cluster comprised  
227 three florets oriented upward and slightly outward. This construction enabled consistent LED  
228 tracking despite behaviors in which rats oriented their heads away from the level plane. Body  
229 location was calculated from difference images obtained by subtracting an image of the empty  
230 arena from each frame capture during an experiment. Movement speeds were calculated from  
231 these body coordinates. The location of the head was calculated as the midpoint between the two  
232 LED clusters for each timepoint. Using Cineplex software (Plexon), LED tracking data was collected



## LEAD EXPOSURE CAUSES HIPPOCAMPAL HYPERSYNCHRONY

233 online during experiments, and body contour tracking was derived offline from recorded videos.

234 Video tracking frame captures (30 fps) were synchronized in real time to the simultaneously

235 recorded neural data via a central timing board (Plexon).

236 *Co-registration of LED and body tracking data.* Following acquisition, all analyses of  
237 behavioral data were performed with custom-written Matlab scripts (MathWorks, Natick, MA). First,  
238 the coordinate system for camera one was mapped onto the coordinate system for camera two,  
239 enabling integration of the two types of tracking data. We then derived for each timestep the  
240 animal's head direction (HD) relative to the environment (from the axis between the two head-  
241 mounted LED clusters); body direction (BD) relative to the environment (from the midpoint between  
242 the LEDs to the center of the body); head angle (HA) relative to the body (using the LED axis  
243 relative to BD); and the rotational velocity of the body.

244 *Definitions of running and stationary bouts.* Rats exhibit a wide range of behaviors that  
245 involve body and head movements at substantial speeds. These movements appear in tracking  
246 data as changes in body and LED coordinates, just as running does. To isolate bouts of locomotion  
247 from other behaviors including grooming and rearing, we first required that movement speed be  
248 maintained above 5 cm/sec for a minimum duration of 1.025 or 2.05 seconds with a minimum peak  
249 speed of 15 cm/sec. We then eliminated all instances where head angle exceeded 35 degrees or  
250 body rotational velocity exceeded 52.5 degrees per second at any time. Stationary bouts were  
251 required to meet the same minimum duration, HA, and rotational criteria and not exceed a  
252 maximum movement speed of 5 cm/sec.

253 *Derivation of oscillatory metrics.* We evaluated the correspondence to animals' movement  
254 speeds of LFP dynamics in the delta-, theta-, and slow and fast gamma-frequency bands (1-4 Hz,  
255 6-10 Hz, 25-55 Hz, and 65-120 Hz, respectively) using amplitude timeseries for each band and  
256 using the power spectral density of the LFP. We derived amplitude timeseries for each band by  
257 resampling to 2kHz the peak-to-trough amplitudes of each oscillatory cycle of the respective band-  
258 pass filtered LFPs. The spectral content of HC recordings was estimated using Welch's method for

## LEAD EXPOSURE CAUSES HIPPOCAMPAL HYPERSYNCHRONY

259 each stationary and running bout. The 1.025 and 2.05 second minimum durations required in our  
260 bout definitions were chosen as a compromise between the relatively fast timescale of rats'  
261 locomotor behaviors, e.g. bouts of running and interspersed pauses, and the reduction in number of  
262 oscillatory cycles (particularly for delta) contributing to amplitude measures for shorter time  
263 windows.

264 Estimates of delta and theta power from the PSDs for individual behavioral bouts were  
265 defined as the mean values across the respective frequency ranges. For each recording site, delta  
266 and theta power estimates were defined as the medians of these values across all bouts of each  
267 type. Delta and theta peak frequencies and peak power estimates were measured directly from the  
268 PSDs for behavioral bouts. Scatterplots of these values are shown in Supplemental Figure 3.  
269 Correlation coefficients relating these measures to running speed were derived for each recording  
270 site across all bouts of each type. Distributions of these correlation coefficients for each group are  
271 shown in Supplemental Figure 4.

272 We defined behavioral modulation of oscillatory metrics as the difference between running  
273 bouts and stationary bouts. First, mean PSDs across bouts of each type were derived for each  
274 recording site. Then behavioral modulation was calculated for each site as the subtraction of the  
275 mean stationary PSD from the mean running PSD. Behavioral modulation for each site was then  
276 normalized either by the area of the mean stationary PSD or by dividing by the mean stationary  
277 PSD to give the percent change at each frequency (as in Figure 2D). Behavioral modulation of delta  
278 and theta were defined as the mean values across the respective bands for each recording site.

279 To further evaluate the effects of  $Pb^{2+}$  exposure on oscillatory synchronization in each  
280 frequency band, we collected peak-to-trough amplitude measurements for every cycle of band-pass  
281 filtered LFPs for each recording site for all bouts of each type. The normalized distributions of these  
282 amplitude measurements are plotted in Supplemental Figure 6.

283 *Seizure Detection.* We observed spike-wave discharges (SWDs) in  $Pb^{2+}$ -exposed rats as  
284 well as at least one control rat (Figs. 1&3, Supp. Fig. 2). Representative examples of these events

## LEAD EXPOSURE CAUSES HIPPOCAMPAL HYPERSYNCHRONY

285 consisted of large-amplitude oscillations, plainly recognizable in the LFP, with a fundamental  
286 frequency in the theta-band and several theta harmonics that were prominent in the spectrogram  
287 (Fig. 3). SWDs occurred when animals were stationary, supporting the view that SWDs are the  
288 physiological manifestations of 'absence' seizures. To compare the incidence of SWDs between  
289  $Pb^{2+}$ -exposed rats and controls, we developed a detection algorithm based on the frequency  
290 composition of the short time-windowed LFP. Using windows of two seconds (one second overlap)  
291 we first derived power estimates within a 2 Hz frequency range centered on the frequency of peak  
292 theta power (5-14 Hz), and within 2 Hz ranges centered on the first and second harmonics of the  
293 theta-peak frequency. For each of these frequency bands, we took the z-scored values across all  
294 time windows throughout each session. Negative values in these timeseries were zeroed yielding  
295 metrics of elevated theta and theta harmonic power. These metrics and the time-averaged LFP  
296 amplitude were smoothed with a Gaussian and their product was z-scored to give a timeseries that  
297 was effective at identifying most SWDs of reasonable strength. This detection timeseries was also  
298 effective at identifying moments of particularly strong theta and theta-harmonic power during  
299 running. We categorized detection peaks as SWDs when they exceeded threshold values of 0.5-4  
300 and only when average movement speeds were below 5 cm/sec within the corresponding PSD  
301 windows. The incidence, strength, and durations of SWDs were then compared between  
302  $Pb^{2+}$ -exposed animals and controls.

303 *PPI experiments.* Pre-pulse inhibition of acoustic startle (PPI) was assessed in male and  
304 female rats at PN28, PN50, and PN120 following a protocol adapted from Abazyan et al. (2014).  
305 Four identical SR-LAB startle chambers (San Diego Instruments Inc., San Diego, CA, USA) were  
306 used to measure startle responses. Rats were placed inside the startle chamber into a mounted  
307 Plexiglas® cylinder with an accelerometer. Broadband background noise and acoustic stimuli were  
308 delivered via a speaker on the ceiling of the chamber. Sound levels were calibrated using a digital  
309 sound level meter, and accelerometer sensitivities for each chamber were calibrated daily.  
310 Presentation of acoustic stimuli was controlled by the SR-LAB software and interface system, and

## LEAD EXPOSURE CAUSES HIPPOCAMPAL HYPERSYNCHRONY

311 accelerometer measurements were recorded. Each experimental session started with a five-minute  
312 period during which rats acclimatized to 68 dB background noise that was continuous throughout  
313 the session. Next, rats' average startle responses were calculated as the mean of 10 acoustic  
314 pulses (120dB, 100ms) presented at a random inter-trial intervals. Rats were left in the enclosure  
315 for an additional five minutes prior to beginning PPI trials. Rats were exposed to the following trial  
316 types: pulse-alone trial (120dB, 100ms); pre-pulse alone (90dB, 20ms); and four pre-pulse–pulse  
317 combinations (20 ms pre-pulse presented 80 ms before the 120 dB, 100 ms pulse) using one of the  
318 five pre-pulse intensities: 74, 78, 82, 86 and 90 dB. Each session consisted of six presentations of  
319 each trial type presented in a pseudorandom order with random inter-trial intervals. The average  
320 response during the 100 ms recording window beginning at stimulus onset was used as the  
321 measure of startle responses. PPI was quantified for each animal as the percent change in startle  
322 amplitude on pre-pulse–pulse trials relative to pulse-alone trials.

323 *Blood Pb<sup>2+</sup> Levels.* Blood Pb<sup>2+</sup> levels of rats used in PPI experiments (Table 1) were  
324 measured in samples obtained from cardiac puncture under sodium pentobarbital anesthesia.  
325 Samples were prepared and measured following protocols provided using the LeadCare Plus  
326 system (Magellan Diagnostics, N. Billerica, MA).

327 *Histology.* At the completion of data collection, rats used in electrophysiological experiments  
328 were anesthetized with isoflurane (5%) mixed with oxygen (800 ml/min) and marking lesions were  
329 made with a NanoZ (Plexon) to deliver 10 $\mu$ A for 10s at each electrode locations. About an hour  
330 later, rats were transcardially perfused with 100 ml phosphate-buffered saline (PBS), followed by  
331 200 ml of 4% paraformaldehyde (PFA, pH 7.4; Sigma-Aldrich, St. Louis, MO). Blood Pb<sup>2+</sup> levels of  
332 these rats were measured in samples obtained from cardiac puncture during the perfusion. Brains  
333 were post-fixed overnight in 4% PFA and then placed in a 30% sucrose solution for cryoprotection.  
334 Frozen brains were cut on a Leica CM3050 S cryostat (40  $\mu$ m; coronal) and Nissl-stained. Marking  
335 lesions were mapped onto plates of the Paxinos & Watson Atlas (2004).

336

## LEAD EXPOSURE CAUSES HIPPOCAMPAL HYPERSYNCHRONY

337 **Results**

338 We assessed the impact of Pb<sup>2+</sup> neurotoxicity on hippocampal network synchronization by  
339 comparing the spectral content of local field potential (LFP) recordings from rats chronically  
340 exposed to Pb<sup>2+</sup> and control animals as they freely explored a large 'open field' environment (Fig. 1).

341 *Normal behavior and power spectra in Pb<sup>2+</sup>-exposed animals.* We found no effect of Pb<sup>2+</sup>  
342 exposure on continuous measures of locomotor behavior including movement speed, spatial  
343 orientation (body and head direction), and rotational velocity, nor did we find differences in  
344 behavioral measures that sampled distinct bouts of running and immobility as defined in Schultheiss  
345 et al. (2020) (Supp. Fig. 1). Spectrograms illustrating the time-frequency decomposition of  
346 hippocampal LFPs were also qualitatively similar between Pb<sup>2+</sup>-exposed rats and control animals  
347 (e.g. Fig. 1E vs F top left), showing elevated theta power (5-14 Hz) coincident with running (green  
348 arrows) and elevated delta power (1-4 Hz) during immobility (cyan arrows). This observation  
349 suggests that chronic, low-level Pb<sup>2+</sup> exposure does not disrupt hippocampal dynamics so severely  
350 as to eliminate the fundamental orthogonal modes that encode alternating segments of locomotion  
351 and stationary behavior during episodes of spatial navigation (Schultheiss et al., 2020).

352 In addition to quasi-normal delta- and theta-dominated hippocampal network modes, in both  
353 Pb<sup>2+</sup>-exposed and normal animals we observed sporadic instances of maximal theta-frequency  
354 network synchronization accompanied by striking theta harmonics (Fig. 1F, right panel; timing  
355 indicated in left panel, red arrowhead). Raw LFP traces giving rise to these theta-harmonic events  
356 were excellent matches to *spike-wave discharges* that are the neurophysiological manifestations of  
357 'absence seizures' in many epilepsies. We observed absence seizures in all eight Pb<sup>2+</sup>-exposed  
358 rats during periods of immobility (Fig. 1F), and in line with previous observations (Taylor et al.,  
359 2019, Rodgers et al., 2015, Letts et al., 2014, Pearce et al., 2014) spike-wave discharges were also  
360 evident in a minority of control rats (Supp. Fig. 2).

361 As anticipated from session spectrograms (Fig. 1), power spectra of hippocampal LFPs  
362 showed qualitatively similar relationships of delta- and theta-band power to locomotor behavior in

## LEAD EXPOSURE CAUSES HIPPOCAMPAL HYPERSYNCHRONY

363 both  $Pb^{2+}$ -exposed animals and controls (Fig. 2A&B). Cycle-by-cycle amplitudes of delta-, theta-,  
364 and fast gamma-frequency oscillations were also consistently modulated by movement speed in  
365 both groups (Figure 2C).

366 *Theta hypersynchrony.* Importantly, theta-synchronization was markedly elevated during  
367 both stationary bouts (1 sec bouts:  $p=0.01$ ,  $t=-2.6$ ,  $df=58$ ; 2 sec bouts:  $p=0.04$ ,  $t=-2.1$ ,  $df=58$ ) and  
368 running bouts (1 sec:  $p=0.002$ ,  $t=-2.8$ ,  $df=58$ ; 2 sec:  $p=0.002$ ,  $t=-3.2$ ,  $df=58$ ) (Fig. 2B). Moreover,  
369 stronger speed modulation of theta further increased theta synchrony (Fig. 2D).

370 We also found that theta frequency was substantially lower in  $Pb^{2+}$ -exposed rats compared to  
371 controls during both stationary bouts (control:  $7.2 \pm 1.1$ , Pb:  $6.8 \pm 1.0$ ;  $p=8.1 \times 10^{-6}$ ,  $t=-4.5$ ,  $df=842$ )  
372 and running bouts (control:  $8.2 \pm 0.4$ , Pb:  $7.8 \pm 0.6$ ;  $p=3.9 \times 10^{-25}$ ,  $t=-10.77$ ,  $df=702$ ) (Supp. Fig. 3).

373 Pairwise 2-D scatterplots of theta power, theta frequency, and running speed for each bout  
374 type suggest that (1) covariation of theta power and theta frequency was disrupted in  $Pb^{2+}$ -exposed  
375 rats relative to controls (Supp. Fig. 3A), right; green vs black lines); and (2) running speed  
376 modulation of theta frequency was confined to a narrower range of speeds (Supp. Fig. 3B, right;  
377 green vs black lines); and in contrast, (3) running speed modulation of theta power occupied similar  
378 parameter spaces in  $Pb^{2+}$ -exposed rats and controls (Supp. Fig. 3C, right; green vs black lines).

379 Comparison of distributions of correlation coefficients confirmed the expected positive  
380 correlations of theta power and frequency to running speed for the majority of recording sites in  
381 both  $Pb^{2+}$ -exposed rats and controls (Supp. Fig. 4). Importantly, we also found that the correlation  
382 of theta power to running speed was heightened in  $Pb^{2+}$ -exposed rats relative to controls ( $p=0.0149$ ,  
383  $t=2.511$ ,  $df=58$ ), potentially reflecting a reduction in the dimensionality of hippocampal  
384 representations in favor of locomotor parameters, i.e. limiting the integration of multidimensional  
385 information arriving at the hippocampus from widespread cortical regions. However, in contrast to  
386 the apparent restriction of running speed modulation of theta frequency to a narrower range of  
387 speeds in  $Pb^{2+}$ -exposed rats, we found that correlations between running speed and theta  
388 frequency were similar in strength between groups (Supp. Fig. 4C, top vs bottom;  $p=0.192$ ,  $t=-$

## LEAD EXPOSURE CAUSES HIPPOCAMPAL HYPERSYNCHRONY

389 1.319,  $df=58$ ). Taken together, these observations suggest that  $Pb^{2+}$  exposure leading to theta  
390 hypersynchrony may impact the fidelity of relationships between theta dynamics and locomotion.

391 Delta power in  $Pb^{2+}$ -exposed rats was also elevated relative to controls during two second  
392 stationary bouts ( $p=0.05$ ,  $t=-2.1$ ,  $df=58$ ), but this trend was weak for one second bouts that are  
393 generally more strongly impacted by behavioral variability ( $p=0.14$ ,  $t=-1.5$ ,  $df=58$ ) (Fig. 2B). No  
394 differences in delta power between groups were observed during running. Interestingly, linear fits to  
395 delta power across individual recording sites from each rat revealed a consistent distal-proximal  
396 gradient of increasing delta power in control animals that was not evident in  $Pb^{2+}$ -exposed animals  
397 (Supp. Fig. 5).

398 Next, we evaluated differences in behavioral modulation of the PSD between  $Pb^{2+}$ -exposed  
399 rats and controls by comparing mean PSDs for stationary bouts (normalized by the integral of the  
400 PSD) to the corresponding mean PSDs for running bouts for each recording site. This approach  
401 yielded 'difference spectra' that revealed stronger behavioral modulation of theta and the first  
402 harmonic of theta in  $Pb^{2+}$ -exposed animals relative to controls (Fig. 2D). Augmentation of the  
403 difference in theta synchronization between behavioral states may reflect increased susceptibility of  
404 HC to entrainment by theta rhythmic inputs recruited during running or to self-organization of theta  
405 oscillations with hippocampal excitation. This analysis also revealed a possible reduction of  
406 behavioral modulation of relative oscillatory power in the 40-60 Hz range.

407 *Effect of  $Pb^{2+}$  exposure on oscillatory cycle amplitudes.* Analysis of PSDs are not well suited  
408 to address potential effects of  $Pb^{2+}$  on gamma-band oscillations. Therefore, to evaluate the impact  
409 of  $Pb^{2+}$  on gamma synchronization, and to further explore delta and theta effects, for each  
410 frequency band we compiled the distributions of the peak-to-trough amplitudes of individual cycles  
411 during stationary and running bouts. As expected, delta, theta, and fast gamma amplitudes were all  
412 strongly modulated by behavior for control rats and for  $Pb^{2+}$ -exposed rats, and slow gamma did not  
413 show differences in amplitude between bout types (Supp. Fig. 6, mirroring Fig. 2C). Comparisons of  
414  $Pb^{2+}$ -exposed rats to controls demonstrated pronounced increases in cycle amplitudes for theta-



## LEAD EXPOSURE CAUSES HIPPOCAMPAL HYPERSYNCHRONY

415 and gamma-frequency bands during stationary bouts (theta:  $p=1.4 \times 10^{-236}$ ,  $t=-32.9$ ,  $df=114,635$ ; slow  
416 gamma:  $p=0$ ,  $t=-78.2$ ,  $df=554,144$ ; fast gamma:  $p=0$ ,  $t=-168.2$ ,  $df=1,276,491$ ) and during running  
417 bouts (theta:  $p=0$ ,  $t=-116.5$ ,  $df=102,653$ ; slow gamma:  $p=0$ ,  $t=-90.5$ ,  $df=491,214$ ; fast gamma:  $p=0$ ,  
418  $t=-101.32$ ,  $df=1,127,377$ ). Although statistically significant, differences in delta cycle amplitudes  
419 between  $Pb^{2+}$ -exposed rats and controls were small relative to those for theta and gamma  
420 (stationary:  $p=2.9 \times 10^{-8}$ ,  $t=-5.5$ ,  $df=41741$ ; running:  $p=1.9 \times 10^{-16}$ ,  $t=8.2$ ,  $df=34211$ ); and it is important  
421 to consider that with such large numbers of individual cycle amplitude measurements for each  
422 frequency band, statistical significance may not be informative.

423 *Pb<sup>2+</sup> exposure exacerbates absence seizures.* As noted earlier, both  $Pb^{2+}$ -exposed animals  
424 and controls exhibited absence seizures during immobility (Fig. 1), and these events were  
425 characterized by spike-wave discharges in the LFP (Fig. 3A) and maximal theta-frequency  
426 synchronization with several harmonics appearing in spectrograms (Fig. 3B). These seizure events  
427 often created a considerable right tail in distributions of theta power estimates during immobility  
428 (Fig. 3C). In many cases theta power distributions were bimodal (Fig. 3C, inset) such that the  
429 lowest theta values corresponded to quiet-wakeful immobility; intermediate and larger values  
430 corresponded to elevated theta during running; and theta values during SWDs were on the order of  
431 the maximal theta during fast running (Fig. 3D, left). Recordings at sites exhibiting weaker theta  
432 enabled easy detection of SWDs (Fig. 3D, right) with a single threshold for theta power or also  
433 using thresholded estimates of power at the first harmonic of theta (Fig. 3D, right, insets). We  
434 recently characterized delta-dominated hippocampal network activity during intermittent locomotion  
435 as a fundamental mode of encoding or segmenting events within a behavioral episode. Seizures  
436 were uniformly distinct from delta states during immobility, exhibiting minimal delta power (Fig. 3E).  
437 Interestingly, strong delta synchronization was often observed to flank seizures in the spectrogram  
438 occurring at the onset or offset (Fig. 3B, red arrowheads), as has been suggested could aid seizure  
439 prediction in a clinical setting.

## LEAD EXPOSURE CAUSES HIPPOCAMPAL HYPERSYNCHRONY

440           Given the variability in the spectral content of recordings at different hippocampal sites (as in  
441 Fig. 3D, left vs right), discerning the spectral signature of SWDs could be a greater or lesser  
442 challenge. Using a novel seizure-detection algorithm that integrates the self-normalized (z-scored  
443 over time) power at theta frequency and at the first two harmonics of theta with the concurrent LFP  
444 signal amplitude, we were able to detect with high reliability spike-wave discharges occurring during  
445 immobility (Fig. 3F). We would argue these are likely to have been absence seizures (Fig. 3B&F).  
446 By varying the detection threshold applied to this algorithm we found a broad range of values for  
447 which the detected events could be visually confirmed. The range across which the algorithm  
448 performed well was bounded below by false positives where the algorithm identified other instances  
449 of theta harmonic activity, typically during running, in addition to spike-wave discharges. We  
450 reduced the majority of false positives by implementing a requirement that the animal be stationary  
451 at the time of the theta-harmonic event. The algorithm's functional range was bounded above by  
452 false negative where the algorithm identified only spike-wave discharges but missed some  
453 proportion of the true incidence. Across the 8-fold range of good performance (0.5 to greater than  
454 4), Pb<sup>2+</sup>-exposed rats exhibited *normal* SWDs (with the same theta fundamental frequency) that  
455 were of significantly greater strength; that were of longer duration; and that occurred during a  
456 greater proportion of rats' time spent stationary (Fig. 3G). Typical doses of ethosuximide (100-200  
457 mg/kg), a preferred drug for absence epilepsy, completely abolished seizures (Fig. 3H).

458           *Disruption of sensorimotor gating.* In a last series of experiments, we tested the effect of  
459 Pb<sup>2+</sup> exposure on PPI of acoustic startle, an assay of sensorimotor gating known to be impaired in  
460 adults with schizophrenia. Figure 4 shows the pattern of results analyzed in males and females  
461 across development (PN28, PN50, and PN120). We tested the baseline acoustic startle responses  
462 in all groups and found no significant differences (all t-test p's >0.05), suggesting any differences  
463 observed in PPI reflect sensory-motor gating.

464           *Males.* We found effects of Pb<sup>2+</sup>-exposure in adult males (PN50 and PN120), but not at  
465 PN28, demonstrating a developmental trajectory for the emergence of PPI deficits that is similar to

## LEAD EXPOSURE CAUSES HIPPOCAMPAL HYPERSYNCHRONY

466 schizophrenia. At PN28, a two-way ANOVA showed a main effect of dB level ( $F_{2.57, 89.83}=68.89$ ,  
467  $p<0.001$ ), no main effect of Pb<sup>2+</sup>-exposure ( $F_{1,35}=0.54$ ,  $p=0.467$ ), and no level x exposure  
468 interaction ( $F_{2.57, 89.83}=2.56$ ,  $p=0.069$ ). At PN50, there was a main effect dB level ( $F_{3.12, 109.23}=53.49$ ,  
469  $p<0.001$ ), a main effect of Pb<sup>2+</sup>-exposure ( $F_{1,35}=11.32$ ,  $p<0.01$ ), but no level x exposure interaction  
470 ( $F_{3.12, 109.23}=1.34$ ,  $p=0.266$ ). At PN120, there was a main effect dB level ( $F_{2.88, 115.11}=59.59$ ,  $p<0.001$ ),  
471 a main effect of Pb<sup>2+</sup>-exposure ( $F_{1,35}=9.30$ ,  $p<0.01$ ), but no level x exposure interaction ( $F_{2.88,$   
472  $115.11}=2.00$ ,  $p=0.120$ ).

473 *Females.* We found no effects of Pb<sup>2+</sup>-exposure in female rats at any age. At PN28, a two-  
474 way ANOVA showed a main effect of dB level ( $F_{2.56, 92.28}=42.74$ ,  $p<0.001$ ), no main effect of Pb<sup>2+</sup>-  
475 exposure ( $F_{1,36}=0.01$ ,  $p=0.942$ ), and no level x exposure interaction ( $F_{2.56, 92.28}=0.17$ ,  $p=0.888$ ). At  
476 PN50, there was a main effect dB level ( $F_{2.89, 101.26}=90.26$ ,  $p<0.001$ ), no main effect of Pb<sup>2+</sup>-  
477 exposure ( $F_{1,35}=0.28$ ,  $p=0.602$ ), and no level x exposure interaction ( $F_{2.89, 101.26}=0.61$ ,  $p=0.606$ ). At  
478 PN120, there was a main effect dB level ( $F_{2.82, 104.17}=57.96$ ,  $p<0.001$ ), no main effect of Pb<sup>2+</sup>-  
479 exposure ( $F_{1,37}=0.02$ ,  $p=0.878$ ), and no level x exposure interaction ( $F_{2.82, 104.17}=0.61$ ,  $p=0.597$ ).

### 480 **Discussion**

481 We analyzed the spectral content of hippocampal LFPs and found that rats chronically  
482 exposed to Pb<sup>2+</sup> exhibited multiple forms of theta-frequency hypersynchrony including absence  
483 seizures with a fundamental frequency in the theta-band and multiple theta harmonics extending  
484 well into the gamma frequency range. Heightened behavioral modulation of theta synchrony was  
485 also observed, but modulation was restricted to a narrower range of locomotor parameters  
486 suggesting that excess theta synchrony caused by Pb<sup>2+</sup> exposure diminishes the encoding capacity  
487 of hippocampal networks. We also found that theta frequency was lower in Pb<sup>2+</sup>-exposed rats  
488 during both running and immobility. Slower frequency oscillations are generally associated with  
489 synchronization of larger populations of neurons, and intrinsic coupling within hippocampal  
490 networks and active membrane properties of hippocampal neurons are well suited to self-organize  
491 theta-rhythmic activity (Goutagny et al., 2009, Stark et al., 2015). Lower frequency theta could

## LEAD EXPOSURE CAUSES HIPPOCAMPAL HYPERSYNCHRONY

492 therefore reflect the broader synchronization of hippocampal networks, entraining a higher  
493 proportion of neurons, and restricting hippocampal functional capacity by reducing the number and  
494 flexibility of network states available. Importantly, parvalbumin expressing interneurons (PVGIs) are  
495 major contributors to theta rhythmic synchronization of hippocampal principal cells (Amilhon et al.,  
496 2015), but PVGIs are reduced in animals chronically exposed to  $Pb^{2+}$ . One potential explanation of  
497 this inconsistency is that the reduction in number is compensated for by increased local connectivity  
498 of the remaining PVGIs to maintain an appropriate excitatory-inhibitory balance within hippocampal  
499 networks. Such a homeostatic function might endow the remaining PVGIs with stronger influence  
500 over the spike timing of larger populations of synaptic targets leading to excessive synchrony.  
501 Interestingly, ablation of NMDARs on PVGIs (presumably without reducing PVGI number) yields the  
502 opposite pattern of effects on theta than  $Pb^{2+}$  exposure, increasing theta frequency while reducing  
503 power, and resulting in disrupted hippocampal representations and impaired memory (Korotkova et  
504 al., 2010).

505         As we have recently demonstrated, distinct modes of delta- and theta-dominated  
506 hippocampal network activity can transition rapidly in tandem with the stops and starts of rats'  
507 locomotor trajectories. In that study delta and theta power were orthogonal across modes such that  
508 strong delta synchronization occurred when theta was weak and vice versus. This pattern of  
509 exclusivity between hippocampal modes may reflect distinct neurophysiological processes or  
510 cognitive functions contributing to spatial navigation and memory (Schultheiss et al., 2020). Thus, to  
511 minimize blurring the oscillatory dynamics of distinct modes that accompany behaviors occurring in  
512 rapid succession, we focused our subsequent analyses on hippocampal synchronization during the  
513 precisely-defined stationary and running bouts.

514         *Absence seizures.* Absence seizures manifested as spike-wave discharges in the  
515 hippocampal LFP were exhibited by all  $Pb^{2+}$ -exposed animals and a minority of control animals.  
516 Comparisons between groups showed that  $Pb^{2+}$ -exposure greatly increased the likelihood and  
517 incidence of seizures, exacerbated the intensity of seizures, increased seizure durations, and

## LEAD EXPOSURE CAUSES HIPPOCAMPAL HYPERSYNCHRONY

518 increased the proportion of time spent stationary during which seizures occurred. It is provocative to  
519 consider that the theta-band fundamental frequency of SWDs may reflect pathological engagement  
520 of theta rhythmogenic mechanisms that are normally the foundation of spatial encoding and  
521 episodic memory systems. Given the complementary observations of theta hypersynchrony during  
522 locomotor behavior and heightened behavioral modulation of theta, we would argue that disrupted  
523 theta rhythmic coordination of hippocampal networks is a key consequence of  $Pb^{2+}$  neurotoxicity.  
524 Since elevated theta has also been found to correspond to disruption of sensory motor gating in  
525 schizophrenia, and  $Pb^{2+}$  exposure is a risk factor for both schizophrenia and epilepsy; perhaps  
526 theta rhythmogenic mechanisms are the common element to all three conditions.

527 In addition to theta hypersynchrony, we also found increased gamma-frequency  
528 synchronization in  $Pb^{2+}$ -exposed animals. Elevated gamma activity in normal animals is integral to  
529 cognitive processes including attention, perception, and memory encoding (e.g. Fell et al., 2001,  
530 Jutras et al., 2009, Yamamoto et al., 2014, Fries et al., 2001), but  $Pb^{2+}$ -exposed animals show  
531 deficits in cognition and memory. One possibility is that the elevated gamma synchronization seen  
532 in  $Pb^{2+}$ -exposed animals is in fact a consequence of the excessive theta synchrony that we have  
533 described. Pastoll and colleagues (2013) showed that theta-frequency excitation of layer II of  
534 medial entorhinal cortex *in vitro* was sufficient to elicit well-timed gamma oscillations nested with  
535 theta cycles. This demonstrates that the local microcircuitry responsible for gamma synchronization  
536 can be engaged by theta-rhythmic excitation in the absence of an intact animal, and this  
537 mechanism could be strongly driven by theta hypersynchrony in  $Pb^{2+}$ -exposed animals.

538 Importantly, hypersynchrony reflects reduced stochasticity in network dynamics which can  
539 be detrimental to encoding capacity and flexibility. We further observed increased behavioral  
540 modulation of theta power. It is important to note that this is not behavioral modulation of encoding  
541 but rather a greater increase in theta synchronization that could reflect a further decrease in  
542 encoding capacity or flexibility during running. For example, single neurons in parahippocampal  
543 structures commonly show conjunctive representations of multiple spatial dimensions. When the

## LEAD EXPOSURE CAUSES HIPPOCAMPAL HYPERSYNCHRONY

544 spatial tuning of conjunctive grid-head direction cells in medial entorhinal cortex is disrupted by  
545 inactivation of the medial septum, the fidelity of those cells for head direction tuning is increased  
546 (Brandon et al., 2013). Here, we revealed greater fidelity of theta power to running speed, which  
547 may also reflect a reduction in the dimensionality of hippocampal encoding. This pattern of effects  
548 would be consistent with reduced integration of information types or modalities of sensory input  
549 accompanying elevated entrainment of hippocampal populations to theta and stronger encoding  
550 fidelity for running speed. This interpretation could also incorporate our finding of disrupted  
551 sensorimotor gating resulting from  $Pb^{2+}$  exposure. If the hippocampus is excessively involved in  
552 encoding behavior, it may be less receptive to incoming sensory information. Furthermore,  $Pb^{2+}$   
553 neurotoxicity and schizophrenia are both related to behavioral inflexibility or cognitive-behavioral  
554 perseveration consistent with this general formulation.

555         Related to the hypersynchrony observed here,  $Pb^{2+}$  exposure has been shown to increase  
556 the likelihood of epilepsy six-fold (Chang et al., 2011; Clark et al., 2012). Epilepsy is defined by its  
557 manifestation of neural hypersynchrony that can be either focal or global. Taking epilepsy as a  
558 model, hypersynchrony can cause specific or general cognitive deficits corresponding to focal or  
559 global appearances, in addition to the damaging effects of the seizure events on network  
560 architecture and dynamics resulting from dysfunctional plasticity resulting from hypersynchrony.

561         Though a lesser effect, we also note that there were interesting correlations of delta  
562 parameters to running speed in  $Pb^{2+}$ -exposed rats when delta would normally be expected to be  
563 weak (as we previously described, Schultheiss et al., 2020). However, in addition to typical  
564 orthogonality between delta- and theta-dominated modes, we sometimes observed apparent  
565 correlations between frequency-bands occurring within a given network mode (such as high delta  
566 *and* high theta). See Figure 5 insets in Schultheiss et al., (2020). This suggests that  $Pb^{2+}$ -exposure  
567 may also cause atypical cross-frequency couplings that are detrimental to cognition and behavior.

568         Our findings strongly implicate multiple forms of theta-rhythmic hypersynchrony in  
569 hippocampus (HC), as well as amplified behavioral modulation of hippocampal theta, as

## LEAD EXPOSURE CAUSES HIPPOCAMPAL HYPERSYNCHRONY

570 fundamental neurophysiological consequences of  $Pb^{2+}$  neurotoxicity. We suggest that hippocampal  
571 networks and/or septohippocampal circuit mechanisms of theta-generation become hyperactive as  
572 a consequence of  $Pb^{2+}$  exposure, likely reflecting altered synaptic coupling strengths and topology  
573 that imbalance dynamics towards theta-dominated activity. The conceptual framework that we  
574 propose base on these insights predicts that cognitive impairments resulting from chronic  $Pb^{2+}$   
575 exposure and aspects of comorbid schizophrenia and epilepsy share etiological underpinnings  
576 whereby strengthened mechanisms of theta rhythmogenesis overpower normal intra-hippocampal  
577 network dynamics disrupting the functional efficacy of cortico-hippocampal circuits.  
578



## LEAD EXPOSURE CAUSES HIPPOCAMPAL HYPERSYNCHRONY

- 579 **References**
- 580 Abazyan, B., Dziedzic, J., Hua, K., Abazyan, S., Yang, C., Mori, S., Pletnikov, M. V., &  
581 Guilarte, T. R. (2014). Chronic exposure of mutant DISC1 mice to lead produces sex-dependent  
582 abnormalities consistent with schizophrenia and related mental disorders: a gene-environment  
583 interaction study. *Schizophrenia bulletin*, 40(3), 575–584. <https://doi.org/10.1093/schbul/sbt071>
- 584 Amilhon, B., Huh, C. Y., Manseau, F., Ducharme, G., Nichol, H., Adamantidis, A., &  
585 Williams, S. (2015). Parvalbumin Interneurons of Hippocampus Tune Population Activity at Theta  
586 Frequency. *Neuron*, 86(5), 1277–1289. <https://doi.org/10.1016/j.neuron.2015.05.027>
- 587 Arbab, T., Battaglia, F. P., Pennartz, C., & Bosman, C. A. (2018). Abnormal hippocampal  
588 theta and gamma hypersynchrony produces network and spike timing disturbances in the Fmr1-KO  
589 mouse model of Fragile X syndrome. *Neurobiology of disease*, 114, 65–73.  
590 <https://doi.org/10.1016/j.nbd.2018.02.011>
- 591 Bast, T., Zhang, W. N., & Feldon, J. (2001a). Hyperactivity, decreased startle reactivity, and  
592 disrupted prepulse inhibition following disinhibition of the rat ventral hippocampus by the GABA(A)  
593 receptor antagonist picrotoxin. *Psychopharmacology*, 156(2-3), 225–233.  
594 <https://doi.org/10.1007/s002130100775>
- 595 Bast, T., Zhang, W. N., Heidbreder, C., & Feldon, J. (2001b). Hyperactivity and disruption of  
596 prepulse inhibition induced by N-methyl-D-aspartate stimulation of the ventral hippocampus and the  
597 effects of pretreatment with haloperidol and clozapine. *Neuroscience*, 103(2), 325–335.  
598 [https://doi.org/10.1016/s0306-4522\(00\)00589-3](https://doi.org/10.1016/s0306-4522(00)00589-3)
- 599 Bast, T., & Feldon, J. (2003). Hippocampal modulation of sensorimotor processes. *Progress*  
600 *in neurobiology*, 70(4), 319–345. [https://doi.org/10.1016/s0301-0082\(03\)00112-6](https://doi.org/10.1016/s0301-0082(03)00112-6)
- 601 Brandon, M. P., Bogaard, A. R., Schultheiss, N. W., & Hasselmo, M. E. (2013). Segregation  
602 of cortical head direction cell assemblies on alternating  $\theta$  cycles. *Nature neuroscience*, 16(6), 739–  
603 748. <https://doi.org/10.1038/nn.3383>

## LEAD EXPOSURE CAUSES HIPPOCAMPAL HYPERSYNCHRONY

- 604 Brubaker, C. J., Dietrich, K. N., Lanphear, B. P., & Cecil, K. M. (2010). The influence of age  
605 of lead exposure on adult gray matter volume. *Neurotoxicology*, 31(3), 259–266.  
606 <https://doi.org/10.1016/j.neuro.2010.03.004>
- 607 Caito, S., & Aschner, M. (2017). Developmental Neurotoxicity of Lead. *Advances in*  
608 *neurobiology*, 18, 3–12. [https://doi.org/10.1007/978-3-319-60189-2\\_1](https://doi.org/10.1007/978-3-319-60189-2_1)
- 609 Canfield, R. L., Henderson, C. R., Jr, Cory-Slechta, D. A., Cox, C., Jusko, T. A., & Lanphear,  
610 B. P. (2003). Intellectual impairment in children with blood lead concentrations below 10 microg per  
611 deciliter. *The New England journal of medicine*, 348(16), 1517–1526.  
612 <https://doi.org/10.1056/NEJMoa022848>
- 613 Cao, X., Huang, S., & Ruan, D. (2008). Enriched environment restores impaired  
614 hippocampal long-term potentiation and water maze performance induced by developmental lead  
615 exposure in rats. *Developmental psychobiology*, 50(3), 307–313. <https://doi.org/10.1002/dev.20287>
- 616 Chang, Y. T., Chen, P. C., Tsai, I. J., Sung, F. C., Chin, Z. N., Kuo, H. T., Tsai, C. H., &  
617 Chou, I. C. (2011). Bidirectional relation between schizophrenia and epilepsy: a population-based  
618 retrospective cohort study. *Epilepsia*, 52(11), 2036–2042. [https://doi.org/10.1111/j.1528-](https://doi.org/10.1111/j.1528-1167.2011.03268.x)  
619 [1167.2011.03268.x](https://doi.org/10.1111/j.1528-1167.2011.03268.x)
- 620 Clarke, M. C., Tanskanen, A., Huttunen, M. O., Clancy, M., Cotter, D. R., & Cannon, M.  
621 (2012). Evidence for shared susceptibility to epilepsy and psychosis: a population-based family  
622 study. *Biological psychiatry*, 71(9), 836–839. <https://doi.org/10.1016/j.biopsych.2012.01.011>
- 623 Fries, P., Reynolds, J. H., Rorie, A. E., & Desimone, R. (2001). Modulation of oscillatory  
624 neuronal synchronization by selective visual attention. *Science (New York, N.Y.)*, 291(5508), 1560–  
625 1563. <https://doi.org/10.1126/science.1055465>
- 626 Goutagny, R., Jackson, J., & Williams, S. (2009). Self-generated theta oscillations in the  
627 hippocampus. *Nature neuroscience*, 12(12), 1491–1493. <https://doi.org/10.1038/nn.2440>

## LEAD EXPOSURE CAUSES HIPPOCAMPAL HYPERSYNCHRONY

- 628 Guilarte, T. R., Opler, M., & Pletnikov, M. (2012). Is lead exposure in early life an  
629 environmental risk factor for Schizophrenia? Neurobiological connections and testable  
630 hypotheses. *Neurotoxicology*, 33(3), 560–574. <https://doi.org/10.1016/j.neuro.2011.11.008>
- 631 Guilarte T. R. (1997). Pb<sup>2+</sup> inhibits NMDA receptor function at high and low affinity sites:  
632 developmental and regional brain expression. *Neurotoxicology*, 18(1), 43–51.
- 633 Guilarte, T. R., Miceli, R. C., Altmann, L., Weinsberg, F., Winneke, G., & Wiegand, H.  
634 (1993). Chronic prenatal and postnatal Pb<sup>2+</sup> exposure increases [3H]MK801 binding sites in adult  
635 rat forebrain. *European journal of pharmacology*, 248(3), 273–275. [https://doi.org/10.1016/0926-](https://doi.org/10.1016/0926-6917(93)90054-t)  
636 [6917\(93\)90054-t](https://doi.org/10.1016/0926-6917(93)90054-t)
- 637 Guilarte, T. R., & Miceli, R. C. (1992). Age-dependent effects of lead on [3H]MK-801 binding  
638 to the NMDA receptor-gated ionophore: in vitro and in vivo studies. *Neuroscience letters*, 148(1-2),  
639 27–30. [https://doi.org/10.1016/0304-3940\(92\)90796-a](https://doi.org/10.1016/0304-3940(92)90796-a)
- 640 Guilarte, T. R., & McGlothan, J. L. (1998). Hippocampal NMDA receptor mRNA undergoes  
641 subunit specific changes during developmental lead exposure. *Brain research*, 790(1-2), 98–107.  
642 [https://doi.org/10.1016/s0006-8993\(98\)00054-7](https://doi.org/10.1016/s0006-8993(98)00054-7)
- 643 Guilarte, T. R., Toscano, C. D., McGlothan, J. L., & Weaver, S. A. (2003). Environmental  
644 enrichment reverses cognitive and molecular deficits induced by developmental lead  
645 exposure. *Annals of neurology*, 53(1), 50–56. <https://doi.org/10.1002/ana.10399>
- 646 Hashimoto, T., Volk, D. W., Eggan, S. M., Mirnics, K., Pierri, J. N., Sun, Z., Sampson, A. R.,  
647 & Lewis, D. A. (2003). Gene expression deficits in a subclass of GABA neurons in the prefrontal  
648 cortex of subjects with schizophrenia. *The Journal of neuroscience : the official journal of the*  
649 *Society for Neuroscience*, 23(15), 6315–6326. [https://doi.org/10.1523/JNEUROSCI.23-15-](https://doi.org/10.1523/JNEUROSCI.23-15-06315.2003)  
650 [06315.2003](https://doi.org/10.1523/JNEUROSCI.23-15-06315.2003)
- 651 Jaako-Movits, K., Zharkovsky, T., Romantchik, O., Jurgenson, M., Merisalu, E., Heidmets, L.  
652 T., & Zharkovsky, A. (2005). Developmental lead exposure impairs contextual fear conditioning and

## LEAD EXPOSURE CAUSES HIPPOCAMPAL HYPERSYNCHRONY

653 reduces adult hippocampal neurogenesis in the rat brain. *Internat. J. of Dev. Neurosci.*, 23(7), 627–  
654 635. <https://doi.org/10.1016/j.ijdevneu.2005.07.005>

655 Jett, D. A., Kuhlmann, A. C., & Guilarte, T. R. (1997). Intrahippocampal administration of  
656 lead (Pb) impairs performance of rats in the Morris water maze. *Pharmacology, biochemistry, and*  
657 *behavior*, 57(1-2), 263–269. [https://doi.org/10.1016/s0091-3057\(96\)00349-8](https://doi.org/10.1016/s0091-3057(96)00349-8)

658 Korotkova, T., Fuchs, E. C., Ponomarenko, A., von Engelhardt, J., & Monyer, H. (2010).  
659 NMDA receptor ablation on parvalbumin-positive interneurons impairs hippocampal synchrony,  
660 spatial representations, and working memory. *Neuron*, 68(3), 557–569.  
661 <https://doi.org/10.1016/j.neuron.2010.09.017>

662 Kuhlmann, A. C., McGlothan, J. L., & Guilarte, T. R. (1997). Developmental lead exposure  
663 causes spatial learning deficits in adult rats. *Neuroscience letters*, 233(2-3), 101–104.  
664 [https://doi.org/10.1016/s0304-3940\(97\)00633-2](https://doi.org/10.1016/s0304-3940(97)00633-2)

665 Letts, V.A., Beyer, B.J. and Frankel, W.N. (2014), Hidden in plain sight: spike-wave  
666 discharges in mouse inbred strains. *Genes, Brain and Behavior*, 13: 519-526.  
667 <https://doi.org/10.1111/gbb.12142>

668 McGlothan, J. L., Karcz-Kubicha, M., & Guilarte, T. R. (2008). Developmental lead exposure  
669 impairs extinction of conditioned fear in young adult rats. *Neurotoxicology*, 29(6), 1127–1130.  
670 <https://doi.org/10.1016/j.neuro.2008.06.010>

671 Miranda, M. L., Kim, D., Galeano, M. A., Paul, C. J., Hull, A. P., & Morgan, S. P. (2007). The  
672 relationship between early childhood blood lead levels and performance on end-of-grade  
673 tests. *Environmental health perspectives*, 115(8), 1242–1247. <https://doi.org/10.1289/ehp.9994>

674 Munoz, C., Garbe, K., Lilienthal, H., & Winneke, G. (1988). Significance of hippocampal  
675 dysfunction in low level lead exposure of rats. *Neurotoxicology and teratology*, 10(3), 245–253.  
676 [https://doi.org/10.1016/0892-0362\(88\)90024-4](https://doi.org/10.1016/0892-0362(88)90024-4)

677 Needleman H. L. (1983). Lead at low dose and the behavior of children. *Acta psychiatrica*  
678 *Scandinavica. Supplementum*, 303, 26–37. <https://doi.org/10.1111/j.1600-0447.1983.tb00939.x>

## LEAD EXPOSURE CAUSES HIPPOCAMPAL HYPERSYNCHRONY

- 679 Needleman, H. L., McFarland, C., Ness, R. B., Fienberg, S. E., & Tobin, M. J. (2002). Bone  
680 lead levels in adjudicated delinquents. A case control study. *Neurotoxicology and teratology*, 24(6),  
681 711–717. [https://doi.org/10.1016/s0892-0362\(02\)00269-6](https://doi.org/10.1016/s0892-0362(02)00269-6)
- 682 Needleman H. (2004). Lead poisoning. *Annual review of medicine*, 55, 209–222.  
683 <https://doi.org/10.1146/annurev.med.55.091902.103653>
- 684 Nihei, M. K., Desmond, N. L., McGlothlan, J. L., Kuhlmann, A. C., & Guilarte, T. R. (2000). N-  
685 methyl-D-aspartate receptor subunit changes are associated with lead-induced deficits of long-term  
686 potentiation and spatial learning. *Neuroscience*, 99(2), 233–242. [https://doi.org/10.1016/s0306-](https://doi.org/10.1016/s0306-4522(00)00192-5)  
687 [4522\(00\)00192-5](https://doi.org/10.1016/s0306-4522(00)00192-5)
- 688 Opler, M. G., Brown, A. S., Graziano, J., Desai, M., Zheng, W., Schaefer, C., Factor-Litvak,  
689 P., & Susser, E. S. (2004). Prenatal lead exposure, delta-aminolevulinic acid, and  
690 schizophrenia. *Environmental health perspectives*, 112(5), 548–552.  
691 <https://doi.org/10.1289/ehp.6777>
- 692 Opler, M. G., Buka, S. L., Groeger, J., McKeague, I., Wei, C., Factor-Litvak, P., Bresnahan,  
693 M., Graziano, J., Goldstein, J. M., Seidman, L. J., Brown, A. S., & Susser, E. S. (2008). Prenatal  
694 exposure to lead, delta-aminolevulinic acid, and schizophrenia: further evidence. *Environmental*  
695 *health perspectives*, 116(11), 1586–1590. <https://doi.org/10.1289/ehp.10464>
- 696 Paxinos, G., and Watson, C. (2004). The rat brain in stereotaxic coordinates 5<sup>th</sup> Edition.  
697 (Massachusetts: Academic Press).
- 698 Pearce, P. S., Friedman, D., LaFrancois, J. J., Iyengar, S. S., Fenton, A. A., MacLusky, N.  
699 J., Scharfman, H. E. (2014). Spike–wave discharges in adult Sprague–Dawley rats and their  
700 implications for animal models of temporal lobe epilepsy. *Epilepsy & Behavior*, 32, 121-131.  
701 <https://doi.org/10.1016/j.yebeh.2014.01.004>
- 702 Rodgers, K. M., Dudek, F. E., & Barth, D. S.. (2015). Progressive, seizure-like, spike-wave  
703 discharges are common in both injured and uninjured sprague-dawley rats: implications for the fluid

## LEAD EXPOSURE CAUSES HIPPOCAMPAL HYPERSYNCHRONY

704 percussion injury model of post-traumatic epilepsy J. Neurosci. 35 (24) 9194-9204.

705 <https://doi.org/10.1523/JNEUROSCI.0919-15.2015>

706 Schultheiss, N.W., Schlecht, M., Jayachandran, M., Brooks, D.R., McGlothan, J.L., Guilarte,  
707 T.R. & Allen, T.A. (2020). Awake delta and theta-rhythmic hippocampal network modes during  
708 intermittent locomotion behaviors in the rat. *Behavioral Neuroscience*.

709 Stansfield, K. H., Ruby, K. N., Soares, B. D., McGlothan, J. L., Liu, X., & Guilarte, T. R.  
710 (2015). Early-life lead exposure recapitulates the selective loss of parvalbumin-positive GABAergic  
711 interneurons and subcortical dopamine system hyperactivity present in schizophrenia. *Translational*  
712 *psychiatry*, 5(3), e522. <https://doi.org/10.1038/tp.2014.147>

713 Stark, E., Eichler, R., Roux, L., Fujisawa, S., Rotstein, H. G., & Buzsáki, G. (2013).  
714 Inhibition-induced theta resonance in cortical circuits. *Neuron*, 80(5), 1263–1276.

715 <https://doi.org/10.1016/j.neuron.2013.09.033>

716 Taylor, J. A., Reuter, J. D., Kubiak, R. A., Mufford, T. T., Booth, C. J., Dudek, F. E., & Barth,  
717 D. S. (2019). Spontaneous recurrent absence seizure-like events in wild-caught rats. *J. Neurosci.*,  
718 39(24), 4829-4841. <https://doi.org/10.1523/JNEUROSCI.1167-18.2019>

719 Wang, T., Guan, R. L., Liu, M. C., Shen, X. F., Chen, J. Y., Zhao, M. G., & Luo, W. J. (2016).  
720 Lead Exposure Impairs Hippocampus Related Learning and Memory by Altering Synaptic Plasticity  
721 and Morphology During Juvenile Period. *Molecular neurobiology*, 53(6), 3740–3752.  
722 <https://doi.org/10.1007/s12035-015-9312-1>

723 Yamamoto J, Suh J, Takeuchi D, Tonegawa S. Successful execution of working memory  
724 linked to synchronized high-frequency gamma oscillations. *Cell*. 2014;157(4):845-857.

725 <https://doi:10.1016/j.cell.2014.04.009>

726



## LEAD EXPOSURE CAUSES HIPPOCAMPAL HYPERSYNCHRONY

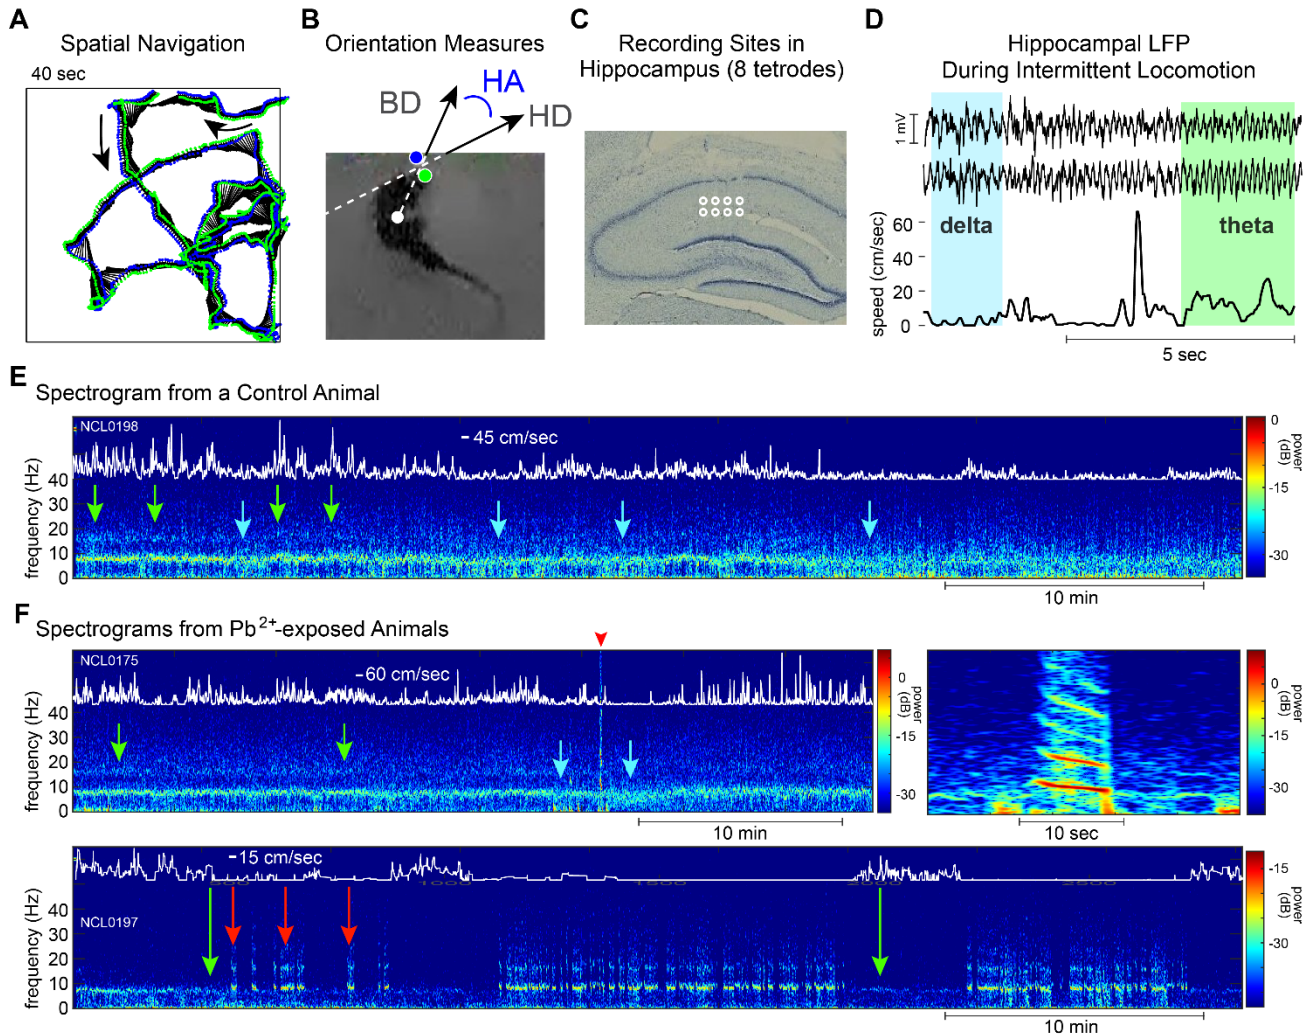

727  
728 **Figure 1. Hippocampal local field potentials (LFPs) during exploratory navigation show**  
729 **similar spectral content in Pb<sup>2+</sup>-exposed rats as controls.** **A.** Representative spatial trajectory  
730 during free exploration of the square (120 cm) 'open field' environment. Black lines represent the  
731 rat's body direction (BD as in **B**), and green and blue dots represent head-mounted LEDs. **B.**  
732 Continuous measures of locomotor behavior, including head direction relative to the environment  
733 (HD) and head angle (HA, derived from HD and BD). **C.** Recording sites of 8 tetrodes located at two  
734 depths on each of four shanks of a silicon probe. Tracks left by the shanks of the implanted probe  
735 are visible as disruptions of the CA1 cell layer. **D.** Representative LFP traces (top) during running  
736 and immobility (bottom) showed corresponding periods of strong theta and delta-band activity (e.g.  
737 as highlighted in cyan and green). **E&F.** Representative spectrograms for control rats (**E**) and Pb<sup>2+</sup>-  
738 exposed rats (**F, top left panel**) showed qualitatively similar patterns of speed modulation (overlaid  
739 white traces) of theta (green arrows) and delta (cyan arrows). **F, top right panel.** Putative absence  
740 seizures occurred in all Pb<sup>2+</sup>-exposed rats. Seizure incidence was highly variability across rats and  
741 across sessions for each rat, i.e. the spectrograms shown in **F** illustrate sessions during which a  
742 single seizure lasting 7 seconds and ~25 minutes of continuous seizing occurred (**top and bottom**  
743 **panels, respectively**). The red arrowhead in the **top left panel** indicates the seizure magnified in  
744 the **top right panel**. Green arrows (**bottom panel**) indicate running accompanied by elevated theta  
745 power. Red arrows indicate seizure bouts during pauses in the rat's intermittent locomotor  
746 behaviors.



## LEAD EXPOSURE CAUSES HIPPOCAMPAL HYPERSYNCHRONY

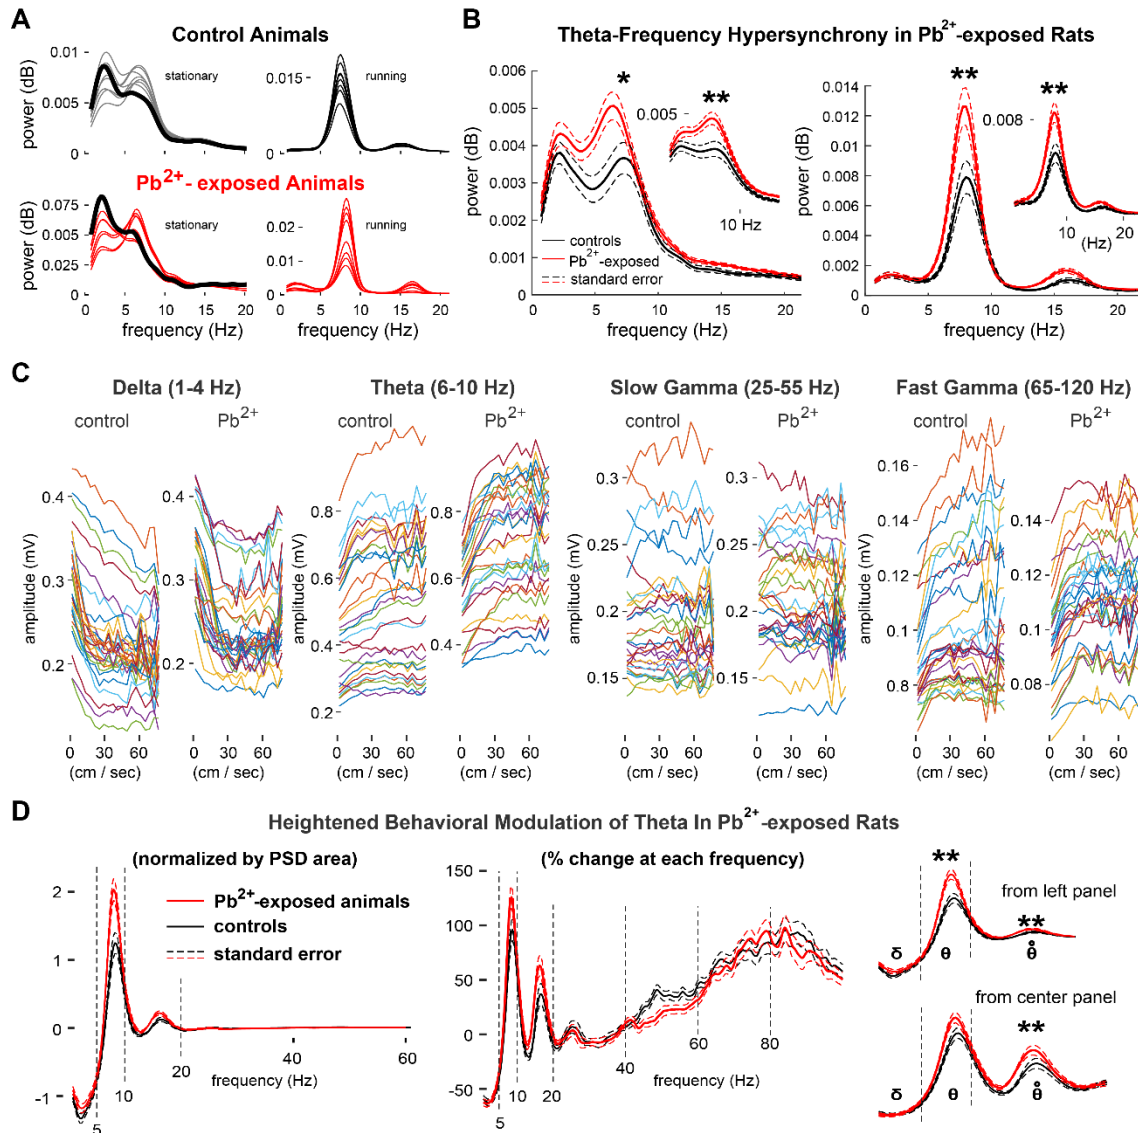

747  
 748 **Figure 2. Theta-frequency hypersynchrony in  $Pb^{2+}$ -exposed rats.** A. Power spectra (PSDs) of  
 749 hippocampal LFPs both for  $Pb^{2+}$ -exposed rats and for controls exhibited diminished delta and  
 750 heightened theta during running (right) relative to stationary bouts (left). Grey and red traces  
 751 indicate representative PSDs of simultaneous recordings from each site in hippocampus. Thick  
 752 black traces (left panels) are PSDs from the site with the highest delta power during immobility,  
 753 highlighting the apparent tradeoff between delta and theta peaks across recording sites in each  
 754 animal. B. Marked elevation of theta power in  $Pb^{2+}$ -exposed rats relative to controls (to >150%)  
 755 during two second bouts of immobility (left) and running (right) (1 sec bouts inset). C. Similar  
 756 patterns of movement speed modulation of cycle-by-cycle amplitudes of delta, theta, and gamma  
 757 oscillations (across all behaviors) in  $Pb^{2+}$ -exposed rats and controls. D. Stronger behavioral  
 758 modulation of theta power in  $Pb^{2+}$ -exposed rats than controls in terms of the absolute change  
 759 (normalized by total power (0-25 Hz)) (left) and the relative change at each frequency (%) (right)  
 760 between stationary and running bouts for control (black) and  $Pb^{2+}$ -exposed rats (red). Enlargement  
 761 of the low frequency range of PSDs in left and center panels (right).  
 762

LEAD EXPOSURE CAUSES HIPPOCAMPAL HYPERSYNCHRONY

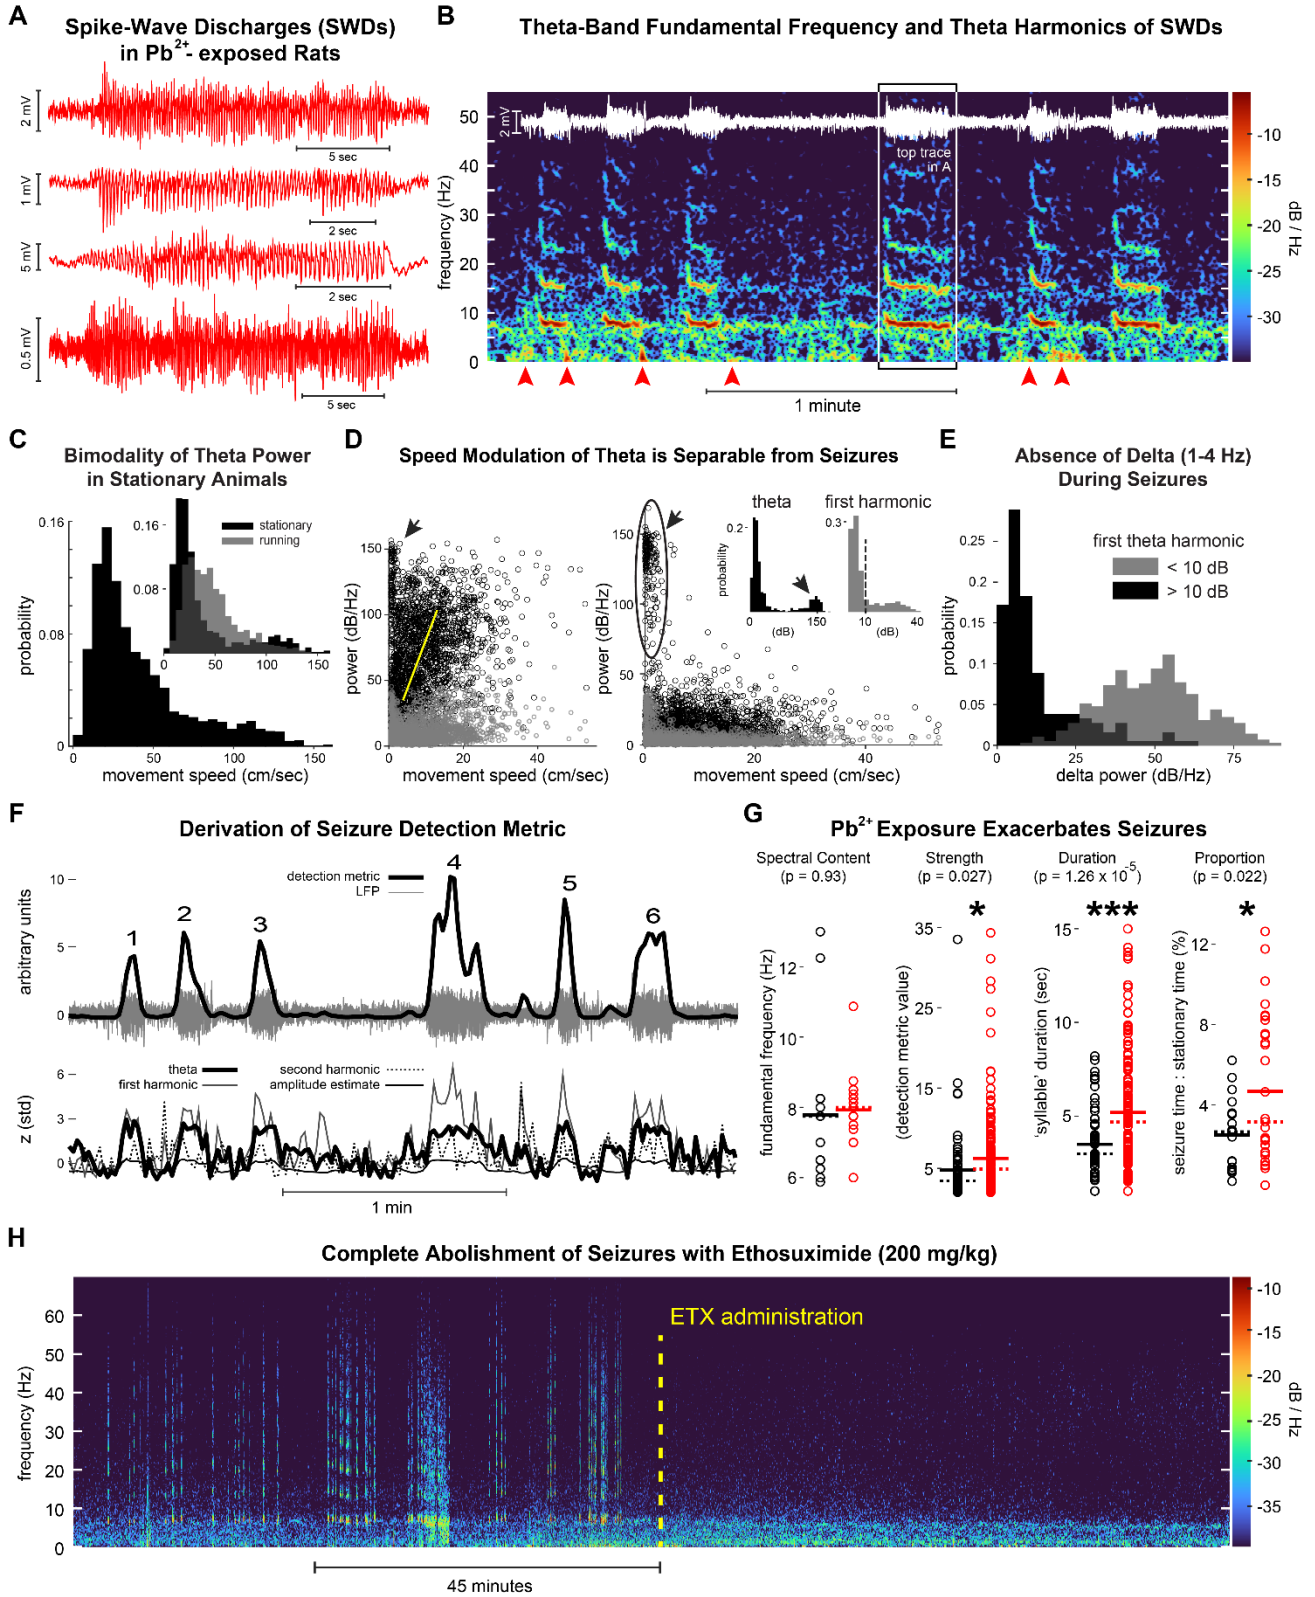

763  
764  
765

**Figure 3. Chronic Pb<sup>2+</sup> Exposure Exacerbates Hippocampal Absence Seizures. A.** Spike-wave discharges (SWDs) in the hippocampal LFP from four Pb<sup>2+</sup>-exposed rats. **B.** Spectrogram

## LEAD EXPOSURE CAUSES HIPPOCAMPAL HYPERSYNCHRONY

766 showing six seizures. SWD overlaid in white. **C.** Theta power distributions during immobility  
767 showing evidence of numerous seizure events creating a pronounced right tail or second peak at  
768 high theta power values. **D.** The theta power to movement speed relationship shows cases where  
769 theta during seizures corresponds to maximal theta during fast running (left), and other cases  
770 where weaker theta draws into significant relief theta values corresponding to SWDs (right). Inset  
771 distributions of theta and harmonic power as in C. **E.** Delta synchronization was minimal when  
772 power at the first harmonic of theta was elevated. **F.** Derivation of the seizure detection algorithm.  
773 **G.** The theta fundamental frequency did not differ between groups, but Pb2+-exposed animals  
774 exhibited exacerbated seizure intensity and incidence.  
775

## LEAD EXPOSURE CAUSES HIPPOCAMPAL HYPERSYNCHRONY

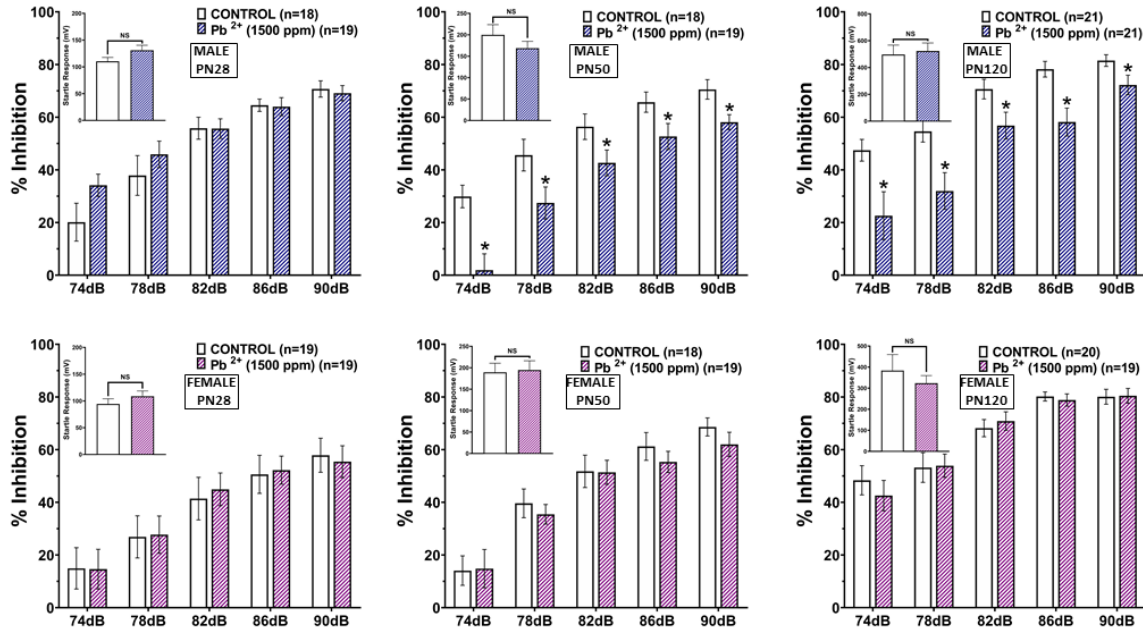

776  
 777 **Figure 4. Prepulse inhibition in male and female rats chronically exposed to Pb<sup>2+</sup>.** The results  
 778 show no effect of Pb<sup>2+</sup> exposure at PN28 but marked inhibition of PPI in male rats at PN50 and  
 779 PN120. No effect of Pb<sup>2+</sup> exposure was found in female rats at any age. Insert graphs in each panel  
 780 are startle response at 120 dB. No effect on startle response was observed in Pb<sup>2+</sup>-exposed male  
 781 or female rats relative to controls at any age. Thus, CELLE does not alter the sensitivity of the  
 782 animal to a startle. However, CELLE produces a significant deficit on PPI in male rats relative to  
 783 controls (\*p<0.05). Data are expressed as mean ± sem. n=number of litters (one male and female  
 784 animal per litter).

785  
 786

## LEAD EXPOSURE CAUSES HIPPOCAMPAL HYPERSYNCHRONY

787

| AGE             | PN28               |                    | PN50               |                    | PN120              |                    |
|-----------------|--------------------|--------------------|--------------------|--------------------|--------------------|--------------------|
| SEX             | Males              | Females            | Males              | Females            | Males              | Females            |
| Control         | ≤1.9<br>n=18       | ≤1.9<br>n=16       | ≤1.9<br>n=17       | ≤1.9<br>n=15       | ≤1.9<br>n=17       | ≤1.9<br>n=15       |
| 1500ppm<br>PbAc | 21.1 ± 0.9<br>n=18 | 20.9 ± 1.1<br>n=16 | 20.2 ± 1.1<br>n=17 | 22.1 ± 1.3<br>n=20 | 19.6 ± 1.3<br>n=17 | 24.3 ± 2.2<br>n=14 |
| p-value         | ≤0.0001            | ≤0.0001            | ≤0.0001            | ≤0.0001            | ≤0.0001            | ≤0.0001            |

788  
789 **Table 1:** Blood Pb<sup>2+</sup> levels (µg/dL) in male and female rats contributing to data represented in Figure  
790 9. Each value is the mean ± sem. n= number of litters (one male and female animal per litter).  
791

## LEAD EXPOSURE CAUSES HIPPOCAMPAL HYPERSYNCHRONY

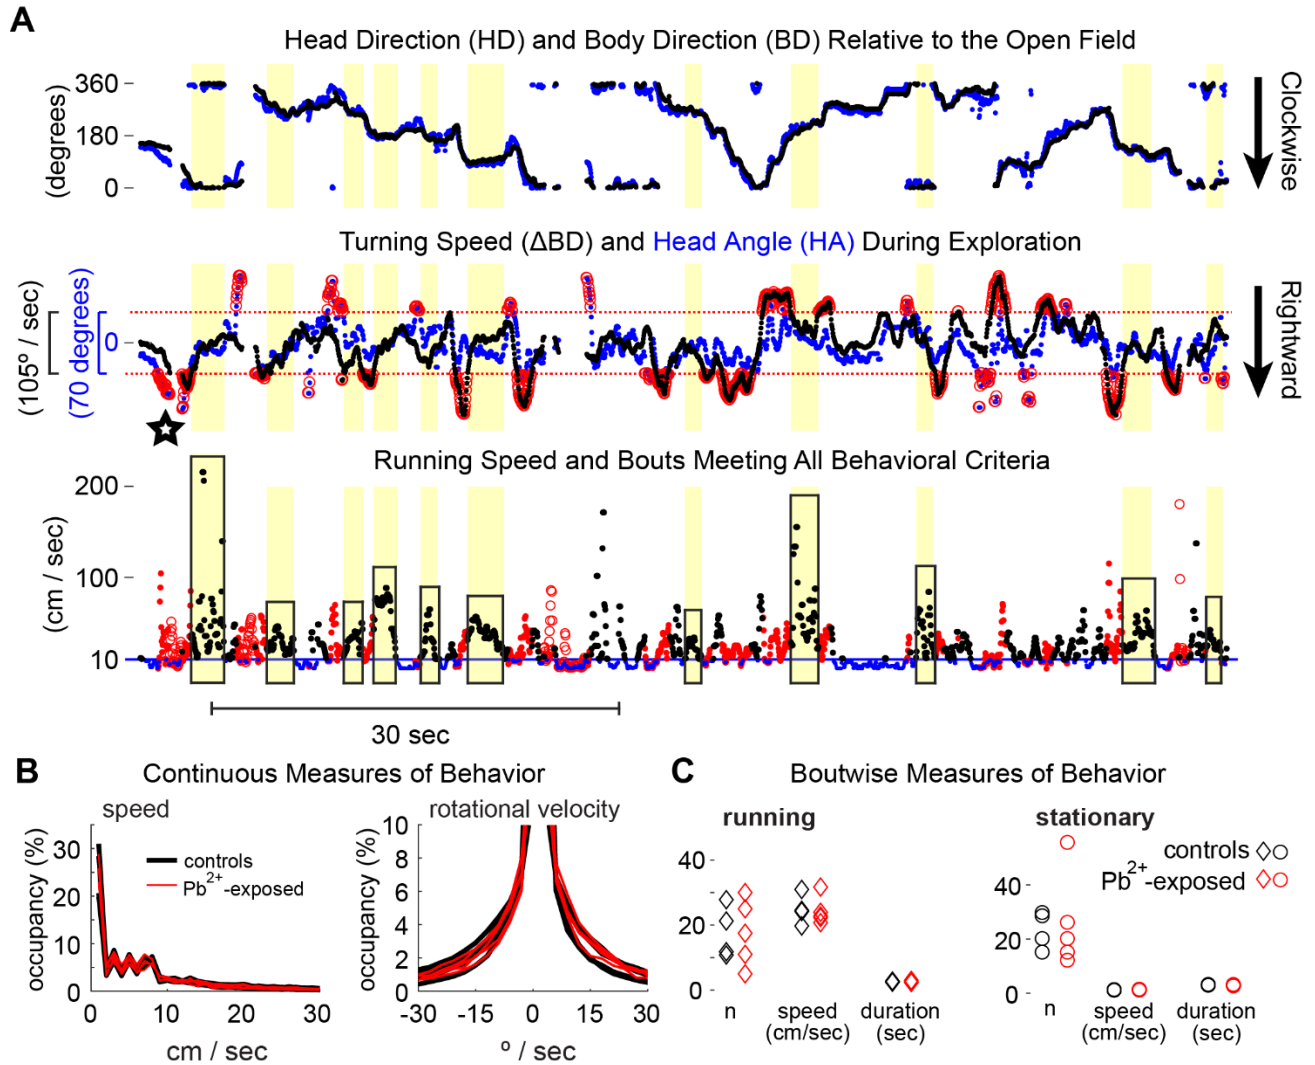

792

793 **Supplemental Figure 1. Precise delineation of stationary and running bouts.** A. Head and body  
 794 direction (top) were used to derive rotational velocity and head angle (middle), which in turn were  
 795 used to identify bouts of running (boxed at bottom) while excluding rotational and reorienting  
 796 behaviors (red points and circles). B. Speed occupancy (left) and rotational velocity (right) measured  
 797 throughout behavioral sessions did not differ between control and  $Pb^{2+}$ -exposed rats, nor did bout-  
 798 wise behavioral measures (C) of running (left) and stationary bouts (right), including the numbers of  
 799 bouts, median movement speeds, and bout durations.



## LEAD EXPOSURE CAUSES HIPPOCAMPAL HYPERSYNCHRONY

### Prefrontal Cortical LFPs During a Spike-Wave Discharge in a Control Rat

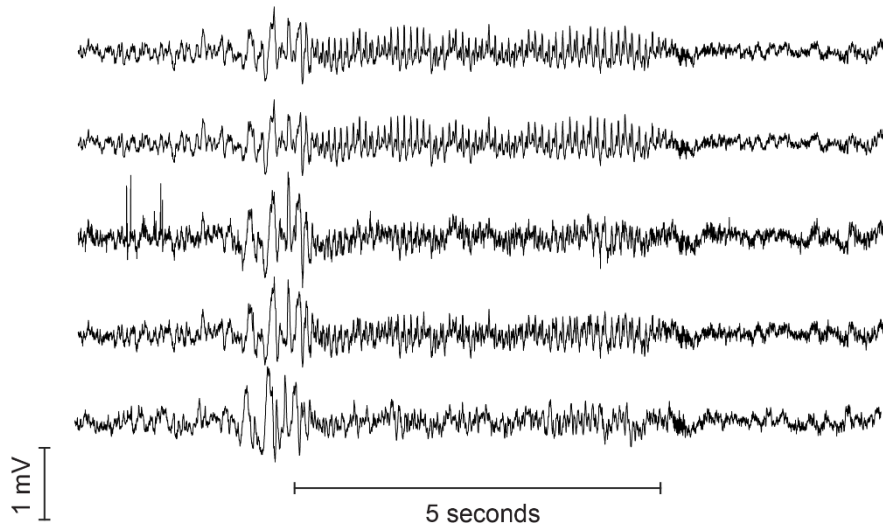

### Hippocampal LFPs During a Spike-Wave Discharge From a Control Rat

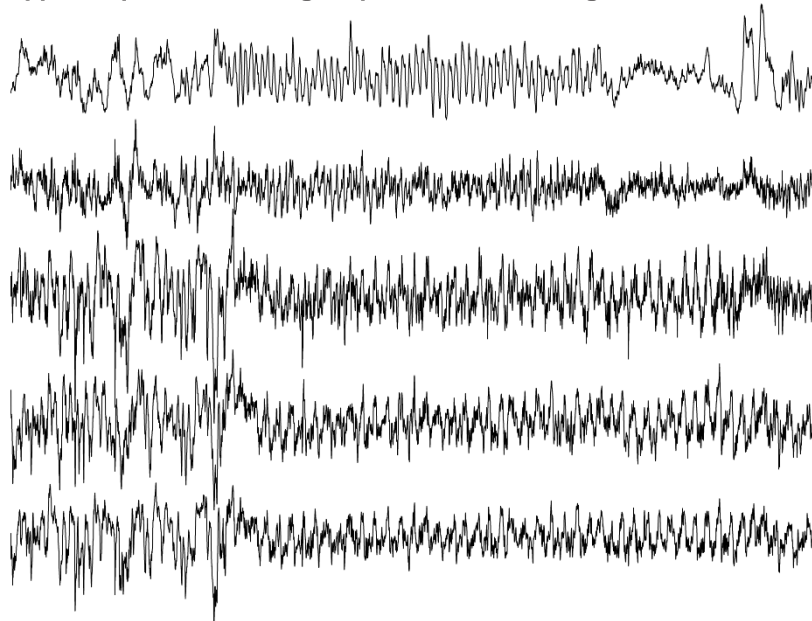

800 **Supplemental Figure 2. Spike-wave discharge in a normal rat.** An example of a spike wave  
801 discharge recorded in a control animal simultaneously at several prefrontal cortical sites (above)  
802 and hippocampal sites (below). Note, hippocampal sites showed considerable variability in terms of  
803 the LFP waveform during the seizure and in the continuation of theta oscillations follow seizure  
804 offset.



## LEAD EXPOSURE CAUSES HIPPOCAMPAL HYPERSYNCHRONY

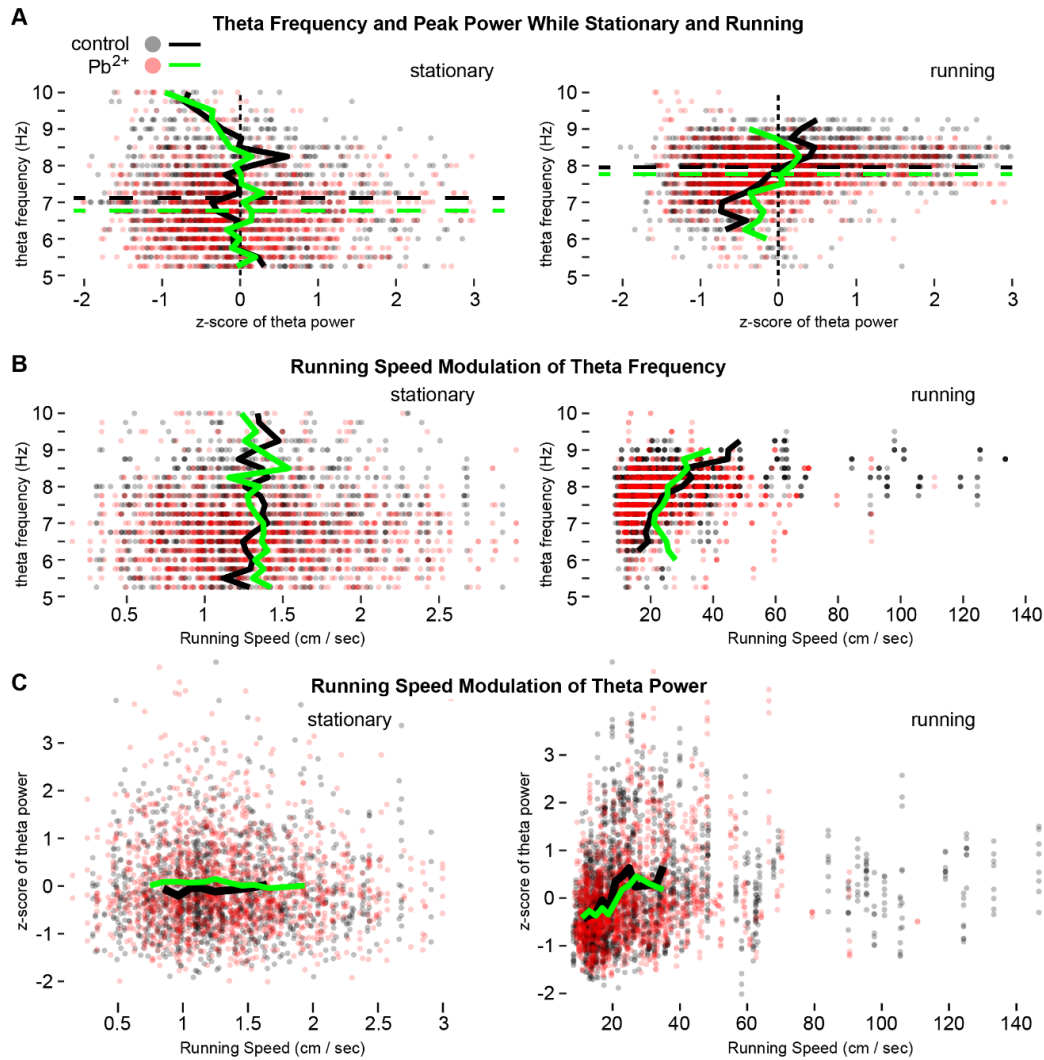

805

806 **Supplemental Figure 3.  $Pb^{2+}$  exposure reduces theta frequency and disrupts running speed**  
807 **modulation. A.** Scatter plots of theta power and frequency taken from the power spectral density  
808 for each recorded channel during each bout of stationary (**left**) and running behaviors (**right**) for all  
809 rats. Black and green lines indicate means for control and  $Pb^{2+}$ -exposed rats, respectively. Dashed  
810 lines indicate the mean theta frequencies for each group. **B.** Running speed modulation of theta  
811 frequency. **C.** Running speed modulation of theta power.

## LEAD EXPOSURE CAUSES HIPPOCAMPAL HYPERSYNCHRONY

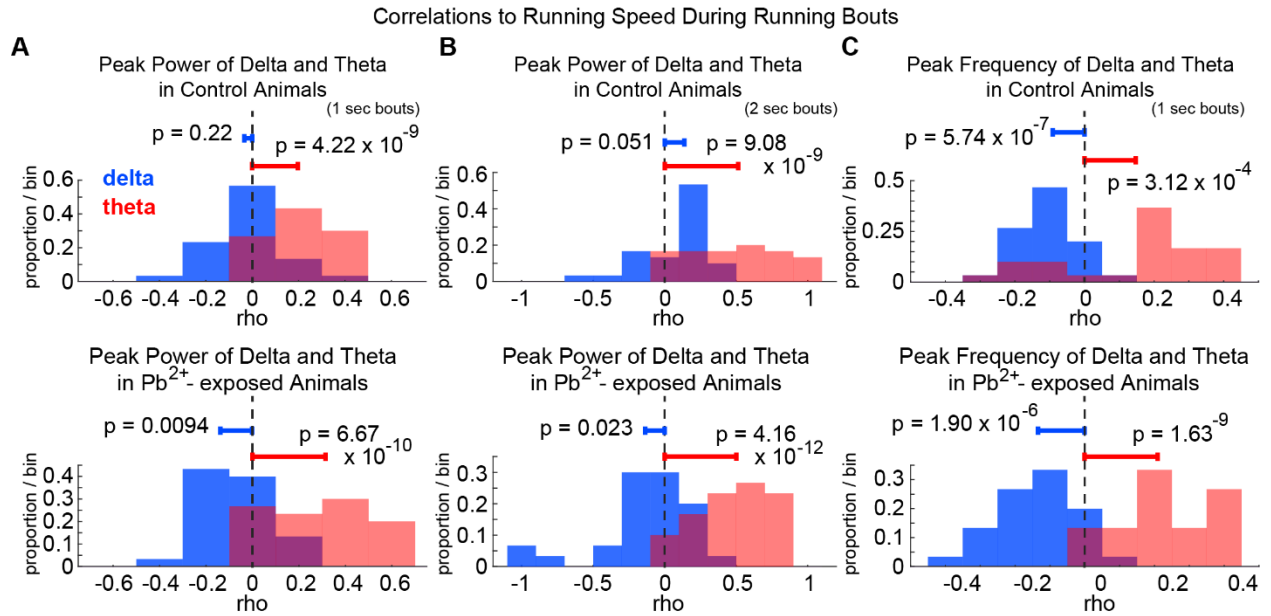

812  
813 **Supplemental Figure 4. Running speed modulation of theta power is elevated in  $Pb^{2+}$ -**  
814 **exposed animals. A.** Distributions of correlation coefficients between delta (blue) and theta (red)  
815 power estimates and running speed. Individual correlations were calculated across running bouts (1  
816 sec) for each recorded channel from control rats (**top**) and  $Pb^{2+}$ -exposed rats (**bottom**). **B.** As in A,  
817 for two second running bouts. **C.** As in A, but comparing correlations of delta and theta peak  
818 frequencies to running speed.  
819

## LEAD EXPOSURE CAUSES HIPPOCAMPAL HYPERSYNCHRONY

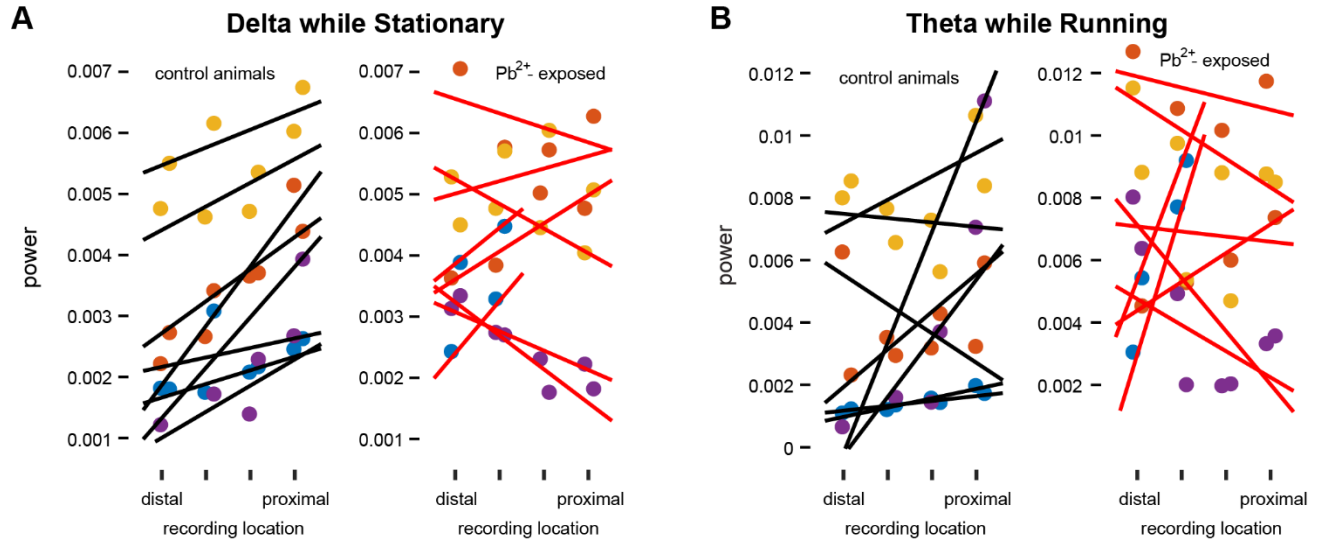

820

821 **Supplemental Figure 5. Proximal-distal gradient of delta and theta power in hippocampus. A.**  
822 An apparent proximal-distal gradient in delta power across probe shanks in stationary control  
823 animals (**left**), was absent in Pb<sup>2+</sup>-exposed animals (**right**). Black and red lines in A and B reflect  
824 the best fits to power estimates along the dorsal and ventral rows of four tetrodes (across shanks)  
825 for each rat. **B.** Theta power at sites along the proximal-distal axis in control and Pb<sup>2+</sup>-exposed  
826 animals during running bouts.

827

828

## LEAD EXPOSURE CAUSES HIPPOCAMPAL HYPERSYNCHRONY

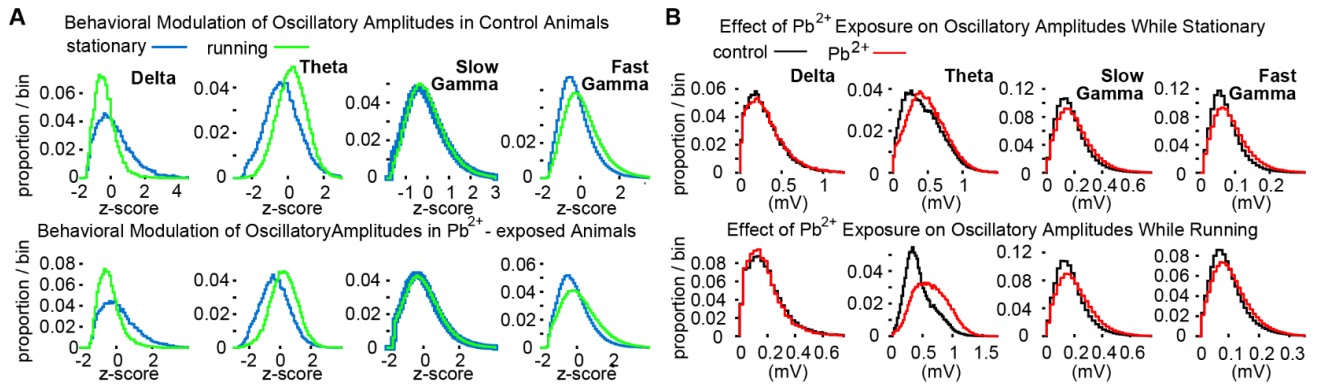

829  
830 **Supplemental Figure 6. Pb<sup>2+</sup> exposure amplifies theta and gamma-frequency synchrony. A.**  
831 Distributions of normalized cycle amplitudes for delta, theta, and gamma frequency bands during  
832 stationary (blue) and running bouts (green) in control (**top**) and Pb<sup>2+</sup>-exposed animals (**bottom**). **B.**  
833 Distributions of unnormalized cycle amplitudes for each frequency band during stationary (**top**) and  
834 running bouts (**bottom**) in control (black) and Pb<sup>2+</sup>-exposed animals (red).  
835
